# Supplementary material
Source: PubMed Central journal article supplement (PMC7104358)
Supplement: pnas.1921037117.sapp.pdf [file pnas.1921037117.sapp.pdf]

Supplementary Information for

## **Ostrich eggshell bead strontium isotopes reveal persistent macroscale social networking across late Quaternary southern Africa**

Brian A. Stewart\*, Yuchao Zhao, Peter J. Mitchell, Genevieve Dewar, James D. Gleason, Joel D. Blum

\*Corresponding author: Brian A. Stewart  
Email: [bastew@umich.edu](mailto:bastew@umich.edu)

### **This PDF file includes:**

Supplementary Text  
Figures S1–S7  
Tables S1–S8  
SI References

## Supplementary Text

### 1. Melikane Rock-Shelter: research history, excavation methods and chronostratigraphy

#### *1.1. Research history*

Melikane (1860 m a.s.l.) is a large rockshelter situated along a major tributary of Lesotho's upper Senqu (Orange) River that bears the same name. Formed in Clarens sandstones, the site sits roughly ~70 meters above the Melikane Valley floor. Together with Sehonghong, Melikane is currently the key archaeological sequence in highland Lesotho. Historical sources suggest that both shelters formed important mountain refuges for rapidly disappearing local hunter-gatherer (so-called 'Mountain San') cultures during the nineteenth century<sup>1</sup>, and probably also groups of mounted livestock raiders<sup>2</sup> of diverse ethnic composition. Melikane's shelter walls possess particularly important colonial-era paintings that attest to the formation of complex, hybridized new cultural identities during a period of extreme political and socioeconomic upheaval<sup>3</sup>. One of these scenes was recorded 1873 by Joseph Orpen, a member of the punitive Grant expedition<sup>4</sup>, who subsequently published them alongside a verbal account of their interpretation by the expedition's Bushman guide, named Qing<sup>5</sup>. These accounts of this scene at Melikane – as well as others at Sehongong and nearby Pitsaneng (where the expedition also camped) – represent some of the only first-hand explanations of the meanings embedded in Bushman rock art.

Melikane was first excavated in 1974 by Pat Carter (University of Cambridge, UK). It was the last of six large shelters (including Sehonghong) that he investigated for a doctoral research project aimed at establishing a basic archaeological sequence for highland Lesotho and the abutting southern uKhahlamba-Drakensberg Escarpment of South Africa<sup>6</sup>. Carter opened an archaeological trench 12 m<sup>2</sup> in area and brought it down to a depth of ~2.6 m below the shelter surface. He recovered an abundance of artifactual material; the levels with Middle Stone Age (MSA)-affiliated cultural materials were particularly prolific. However, samples submitted by Carter for conventional radiocarbon dating from the bottom two-thirds of the sequence returned ages near or beyond the limit of the radiocarbon technique at the time ( $\geq 40$  ka)<sup>7</sup>, meaning the bulk of Melikane's deposits could not be dated. Moreover, Carter excavated Melikane in artificial 10 cm-thick spits that crosscut the sequence's natural stratigraphy. The resulting lack of chronological and contextual precision made it necessary to return to the site to conduct a more controlled, systematic excavation applying modern stratigraphic and chronometric techniques.

In 2007, a team lead by Zenobia Jacobs (University of Wollongong, Australia) returned to Melikane to re-open Carter's original trench in order to obtain sediment samples for optically stimulated luminescence (OSL) dating. These samples formed part of a broader project to temporally resolve key phases of the southern African MSA<sup>8,9</sup>. The deepest OSL samples at Melikane returned dates of over 80 ka, identifying it as the oldest chronometrically dated deposit in Lesotho. Encouraged by these results, the following year a team led by Brian Stewart (University of Michigan, USA) and Genevieve Dewar (University of Toronto, Canada) returned to Melikane to re-excavate the shelter using modern analytical techniques and a multidisciplinary approach<sup>10</sup>. A new trench 6 m<sup>2</sup> in area was placed a meter east of Carter's original trench, with the long axis oriented parallel to his (Figure S1). The team reached bedrock at a similar depth to Carter at the completion of a second season in 2009. This newer work at Melikane forms part of a larger collaborative project, 'Adaptations to Marginal Environments in the Middle Stone Age' (AMEMSA), co-directed by Stewart and Dewar.

## 1.2. Excavation methods

Melikane was excavated using a single context recording system with individual stratigraphic units removed according to similarities in color, texture and sedimentary inclusions. For stratigraphic units thicker than 5 cm, excavation proceeded in arbitrary 5 cm-thick spits within the unit. Three cm spits were employed for levels from Layer 18 and below, which are generally thinner (Figure S2). Special finds, faunal remains diagnostic to taxon, and stone tools considered temporally diagnostic were three-dimensionally piece-plotted. Sediments from the upper levels were sieved using 1.5 mm mesh until the high moisture content necessitated a switch to 3 mm mesh. Excavated materials recovered from sieving were preliminarily sorted on-site and packaged for transport to various institutions for specialist analyses. Most, however, are being analyzed at the Museum of Anthropological Archaeology, University of Michigan (where they are also temporarily curated) and the Department of Anthropology, University of Toronto Scarborough. Particularly large and/or well-preserved individual charcoal fragments were collected *in situ* for radiocarbon dating. Bucket flotation was used for sediments from features and other visibly organic-rich deposits in order to obtain larger charcoal and macrobotanical assemblages. The trench was stepped down for safety, with bedrock reached at 2.6 m below the surface in a single square (Square S6). In total, 8.92 m<sup>3</sup> of archaeological deposit was removed over two field seasons.

A total of 12 ostrich eggshell beads were recovered from the Stewart/Dewar excavations at Melikane. All derive from the uppermost Layers 1 and 2, which are radiocarbon dated to the late Holocene (3.3–0.15 ka). The shift to slightly larger (3 mm) mesh size should not have impacted the recovery of ostrich eggshell beads, which across late Pleistocene southern Africa rarely fall below 4 mm in maximum dimension<sup>11</sup>. Rather, the absence of beads in strata deeper than Layer 2 (>24 ka) likely stems from poor organic preservation caused by frequent water ingress. All beads recovered were complete (stage 11 cf. Kandel and Conard<sup>12</sup>). The lack of any other stage of bead manufacture suggests that these beads were not made on site. There are no ostrich eggshell fragments or ostrich bones. Six of the beads have clear wear facets, indicating they were strung and worn for a long period, while a seventh has a heavily worn outer rim. Eleven of Melikane's 12 beads were analyzed in this study (Figure S3).

## 1.3. Chronostratigraphy

The Melikane sequence excavated in 2008/9 was composed of 45 individual stratigraphic units grouped into 30 layers<sup>10</sup> (Figure S2). The low number of contexts/layers relative to Sehonghong (see SI Appendix, section 2) is a consequence of post-depositional diagenesis of the sediments. There is ample evidence for this at Melikane, particularly in the sequence's upper and central phases (Phases I–IV; Layers 1–16), which include often diffuse interfaces between strata, mottling from *in situ* weathering, high frequencies of rounded to sub-rounded clasts, and diverse microscopic indicators<sup>11,13</sup>. Such chemical transformations are consistent with the presence of two fissures in the rear shelter wall (Figure S1), which link the shelter to an active hydrogeological system. Despite its taphonomic complexities, however, the sequence has produced high-quality evidence for long-term cultural and paleoenvironmental changes across 80 kyr of human history in the highland Maloti-Drakensberg. Particularly encouraging is the generally excellent agreement between the site's cross-correlated AMS radiocarbon and single-grain OSL chronologies<sup>10</sup>. Guided by the resulting geochronology, as well as changes in lithology and lithic technology, six major occupational phases (I–VI) can be distinguished. From top to bottom the phases (and associated layers) recognized in the 2008/9 excavation are:

### Phase I (Layers 1–2)

The uppermost levels at Melikane are loose to medium-compacted, dark greyish-brown sandy silts with high ash and charcoal content. Faunal remains here are well-preserved and artifact assemblages diverse. The latter include ostrich eggshell beads, a bone pendant, bone points, freshwater mollusk shells, fire-damaged rock, pottery, ochre fragments, and Later Stone Age (LSA) stone tools of both macro- and microlithic character. Here, as in every phase at Melikane except the earliest (Phase VI), the lithic

assemblage is dominated by high-quality crypto-crystalline silicates (CCS), of which most are amygdaloidal cherts. The northern third of Layer 2 yielded the site's most well-preserved hearth, rock-lined, rich in charcoal and ash, and with much associated bone and seemingly *in situ* lithic knapping scatters. Most radiocarbon dates from Phase I are late Holocene (3.3 ka–0.15 ka) (Table S2). However, an aberrant OSL determination of  $8.7 \pm 0.7$  ka from an equivalent stratum to Layer 2 in Carter's adjacent trench suggests these uppermost sediments have suffered disturbances, likely from bioturbation (Table S2).

### Phase II (Layers 3–5)

A series of heavily compacted, yellowish- or goldish-brown silty sands with abundant sub-rounded to rounded sandstone clasts interspersed with much more anthropogenic, very dark brown charcoal-rich sandy silt lenses. The clasts are commonly imbricated in a northerly direction towards the mouth of the shelter, suggesting they represent colluvial influx events whereby exogenous material was introduced into the deposit from rear-wall fissures. Inclusions of sub-rounded burnt bone and charcoal in micromorphological thin-sections, together with the heavily rolled nature of the lithics, suggest these levels represent an intermixing of geogenic and autochthonous anthropogenic sediments as the latter were repeatedly scoured by influxes of the former. Grain size peaks are the highest in the sequence and organic carbon and carbonate contents are consistently low. While efforts to date the uppermost levels (Layers 3–4) have been unsuccessful, an early Last Glacial Maximum age for Layer 5 is indicated by radiocarbon (24.5–23.6 ka) and OSL ( $27.2 \pm 1.8$  ka) (Tables S1 and S2). An aberrant radiocarbon date of 3.4–3.2 ka indicates some localized disturbances are present, consistent with several animal burrows visible in section. Lithic assemblages are highly informal early LSA-like in character with frequent *pièces esquillées* and other bipolar products.

### Phase IIIa (Layers 6–10)

The strata comprising Phase IIIa are a series of massive sandstone rockfall layers with dark brown sandy silt matrices alternating with coarse colluvial gravels similar to those of Phase II and dark blackish brown, much more anthropogenic levels. Of special note is Layer 8, a blackish brown, extremely charcoal-rich burning stack composed of charred organic material and ash microstrata. Micromorphological analyses of Layer 8 reveal the presence of articulated phytoliths and the preservation of entire plant structures of leaves, stems and charred parenchymous tissue. This burning stack directly overlies the site's largest rockfall horizon (Layer 9) some 10–40 cm in thickness. Stark differences between lithological units in this phase speak to environmental instability, with human occupations interspersed with colluvial ingressions from high-intensity storms and roof-falls from enhanced freeze-thaw action. Radiocarbon samples were subjected to highly rigorous acid-base-wet oxidation stepped-combustion (ABOx-SC) pretreatment to eliminate contamination. Both those and OSL samples taken from Phase IIIa returned ages of mid-Marine Isotope Stage (MIS) 3 (42.6–36.3 ka and  $41.3 \pm 3$  ka, respectively) (Tables S1 and S2). A final aberrant date of 0.45–0.3 ka for Layer 6 suggests bioturbation reached into this uppermost level of Phase III, but not deeper. Lithic assemblages here are a mix of informal flake and core technologies together with rarer diagnostic MSA elements, blades and bladelets.

### Phase IIIb (Layers 11–16)

This sub-phase shares similarities in both age and sedimentological character to overlying IIIa, though some important differences merit its partition. While rockfall is present (and sometimes substantial), deposition of colluvial gravel layers that become so conspicuous in Phases IIIa and II had not yet begun. Instead, Phase IIIb is dominated by mottled, yellowish brown/black sandy silt layers (Layers 12 and 14) with sporadic large-medium roof-fall slabs and occasional scree. Interspersed between these mottled levels are a series of thinner ( $\leq 4$  cm), more charcoal-rich anthropogenic horizons (Layers 11, 13 and 15). Moreover, the Phase IIIb lithic assemblages contain a higher proportion of both blades and typical MSA forms than those of overlying IIIa. Radiocarbon dates suggest IIIb occurred immediately before IIIa; traditional acid-base-acid (ABA)-pretreated ages (Layers 10 and 12) are statistically indistinguishable from those from IIIa, but the sole sample to survive ABOx-SC (from Layer 14) returned an age of 43.0–40.7 ka (Table S1). This agrees

statistically with an OSL age from an equivalent stratum in Carter's adjacent trench ( $45.9 \pm 3.8$  ka) (Table S2). Another OSL sample for Phase IIIb's deepest unit, Layer 16, produced a stratigraphically inverted age of  $53.8 \pm 3.2$  ka that seems erroneously old. Together, Phases IIIa and b add up to over one meter of stratigraphy, which means that over one-third of the 2.6 m Melikane sequence was deposited in less than ~10 kyr (~46-37 ka) (Figure S2).

#### Phase IV (Layers 17–21)

The sediments comprising this phase and those below it (V and VI) were deposited under less volatile conditions, when Melikane was a younger, less energetic rock shelter. Alternating layers of dark yellowish brown, dark blackish brown and yellow/black mottled sandy silts characterize these strata, with variably high content of small, rounded clasts ('pea gravel') and infrequent small sandstone slabs. Contacts between stratigraphic units are sharper than above, though micromorphological observations suggest that water throughput dissipated internal microstratigraphy. Amorphous iron staining of lithics also indicates the strong influence of water, and sparitic calcitic coatings may reflect the dissolution and re-precipitation of calcium carbonate from ash. Lithic technologies of Phase IV are distinctly more MSA in character, with convergent flakes struck from small Levallois cores a conspicuous component. Attempts to pretreat radiocarbon samples with ABOx-SC failed at this depth. Two samples with standard ABA pretreatment produced ages of 49.6–43.7 ka (Layer 20) and 43.3–41 ka (Layer 19). These are almost certainly too young for this phase, though the former approaches its probable age as suggested by a single OSL age of  $50 \pm 1.9$  ka for a Carter level equivalent to Layer 20.

#### Phase V (Layers 22–25)

A series of very dark to blackish brown sandy silt levels that are charcoal-rich for this depth and heavily anthropogenic. The sediments possess a slightly higher pea gravel content and more frequent, sub-angular small sandstone slabs and spalls than Phase IV. Here we are beyond the 'radiocarbon ceiling'. Instead, these levels are dated by a single OSL determination of  $61 \pm 2.5$  ka from a Carter level equivalent to Layer 23 (Table S2). While it is possible that this date does not capture the full span of Phase V, a late MIS 4 age is consistent with its lithic assemblages. These include elements typical of the Howiesons Poort technocomplex, including numbers of backed artifacts and high frequencies of sinuous blades struck from single platform cores. Phase V and underlying Phase VI were only reached in Square S6.

#### Phase VI (Layers 26–30)

The basal levels at Melikane consist of very dark to blackish brown clayey silts with small, sub-angular gritty clasts. Yellow mottling and associated degraded sandstone spalls increase down-sequence, culminating in the deepest unit, Layer 30, which is composed largely of decomposed bedrock and is culturally nearly sterile. Two statistically overlapping OSL determinations of  $79.5 \pm 3.1$  ka and  $83.2 \pm 6.2$  ka were obtained for Carter equivalents of Layers 28 and 30, respectively (Table S2). These ages are the earliest chronometric dates thus far obtained for Lesotho and suggest that the earliest human occupations at Melikane occurred during the closing millennia of MIS 5, during sub-stage 5a. The Phase VI lithic assemblages differ from all deposited afterwards in being dominated by relatively coarse-grained silicified sandstones rather than CCS. Opposed platform blade cores and informal multidirectional cores are typical, with long blades very common and tool forms dominated by borer/perforators and diverse scrapers. There is extensive evidence of soft-hammer percussion.

**Figure S1.** Site photographs of Stewart/Dewar 2008/9 (AMEMSA) excavations at Melikane. **a)** Excavation in process of Layer 2 (late Holocene) with large rock-lined hearth emerging in foreground. **b)** Excavation in process of mottled, sandstone-rich Layer 16 (mid-MIS 3). **c)** Position of project AMEMSA's 2008/9 trench in relation to Carter's original 1974 trench (backfill of latter partially removed). Note fissures in shelter rear wall.

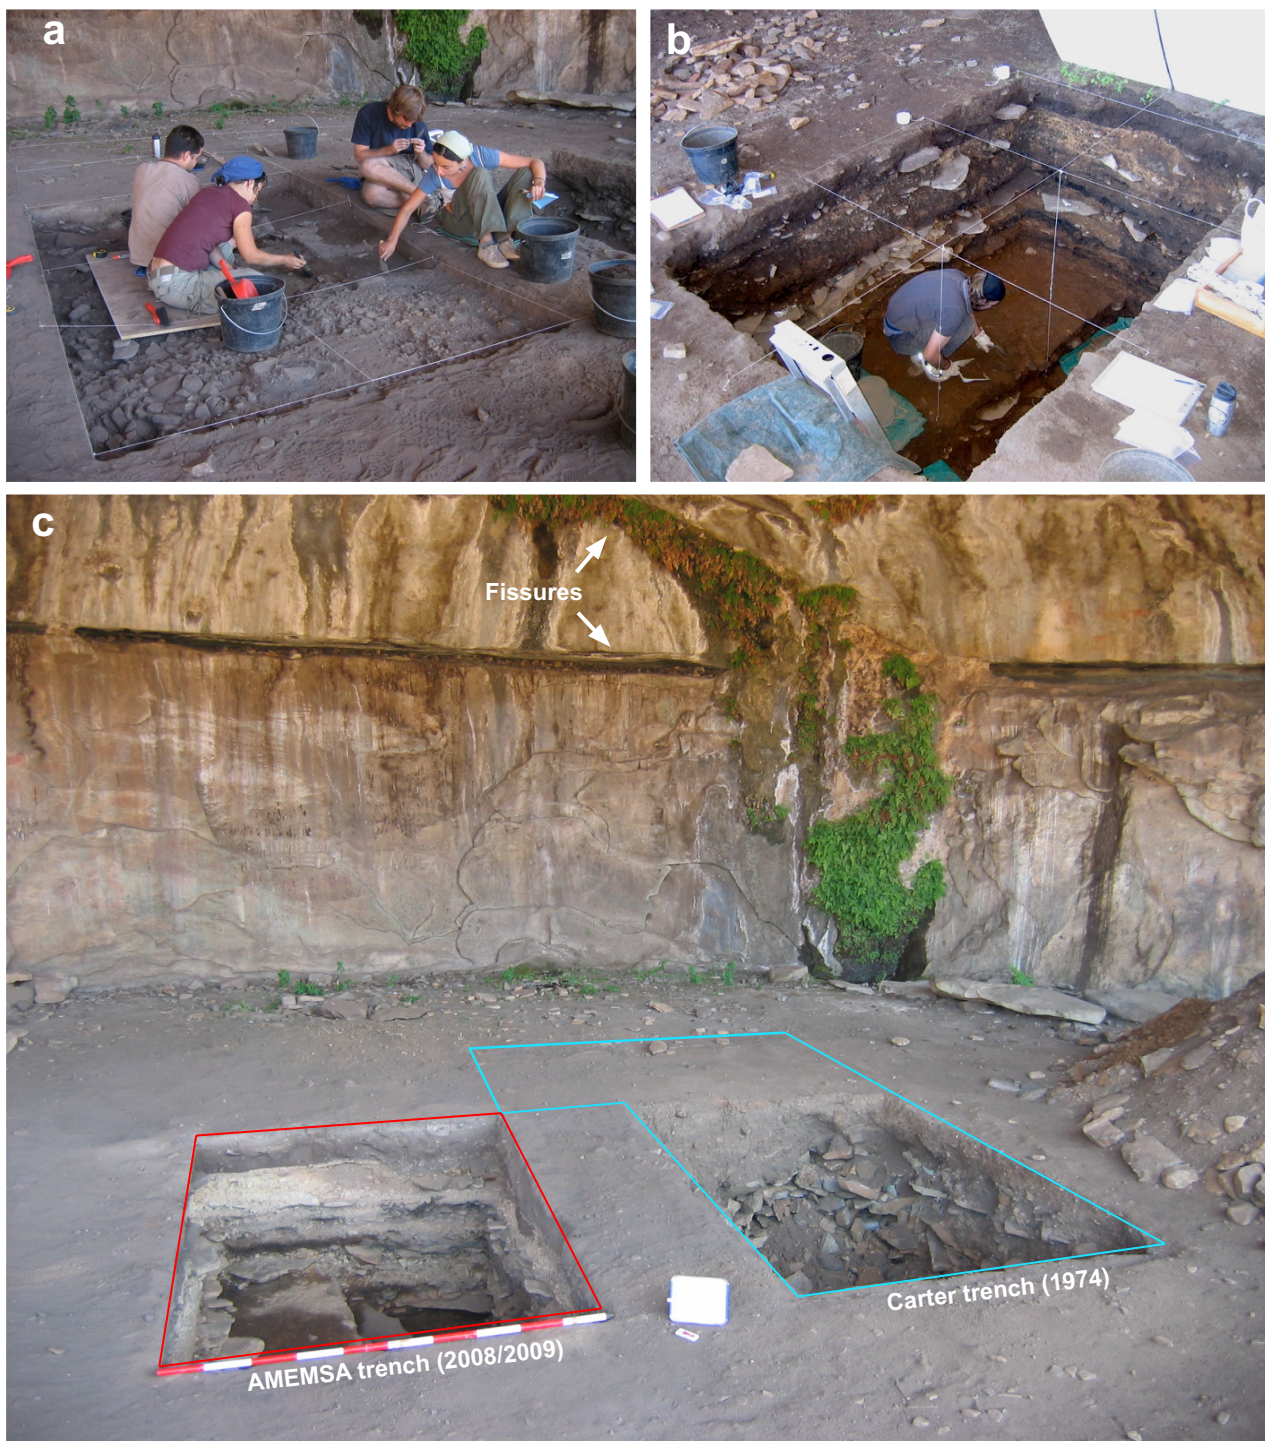

**Table S1.** Radiocarbon dates obtained from Stewart/Dewar excavations at Melikane Rock-Shelter.

| Layer | Context/spit | Laboratory number | 14C BP (ABA) | Cal BP* (95.4%) (ABA) | Laboratory number (ABOx-SC) | 14C BP (ABOx-SC) | Cal BP* (95.4%) (ABOx-SC) | Material | Reference                    |
|-------|--------------|-------------------|--------------|-----------------------|-----------------------------|------------------|---------------------------|----------|------------------------------|
| 1     | 2/1          | OxA-22965         | 254 ± 22     | 307–151               | -                           | -                | -                         | Charcoal | Stewart et al. <sup>10</sup> |
| 2     | 2/2          | OxA-22968         | 270 ± 22     | 319–152               | -                           | -                | -                         | Charcoal | Stewart et al. <sup>10</sup> |
| 2     | 2/3          | OxA-22966         | 3047 ± 27    | 3336–3071             | -                           | -                | -                         | Charcoal | Stewart et al. <sup>10</sup> |
| 3     | 4/1          | OxA-22967         | 207 ± 22     | 295–11                | -                           | -                | -                         | Charcoal | Stewart et al. <sup>10</sup> |
| 3     | 4/2          | OxA-22837         | 445 ± 22     | 507–338               | -                           | -                | -                         | Charcoal | Stewart et al. <sup>10</sup> |
| 5     | 7(6-8)/1     | OxA-23028         | 20000 ± 190  | 24469–23546           | -                           | -                | -                         | Charcoal | Stewart et al. <sup>10</sup> |
| 5     | 6-8/2        | OxA-22838         | 3112 ± 25    | 3366–3181             | -                           | -                | -                         | Charcoal | Stewart et al. <sup>10</sup> |
| 6     | 9/75-80      | OxA-22963         | 333 ± 23     | 448–301               | -                           | -                | -                         | Charcoal | Stewart et al. <sup>10</sup> |
| 6     | 9/80-85      | OxA-23040         | 32040 ± 370  | 36736–35042           | OxA-23039                   | 33070 ± 380      | 38331–36272               | Charcoal | Stewart et al. <sup>10</sup> |
| 7     | 10/90-95     | OxA-23032         | 35400 ± 900  | 41871–38323           | OxA-23041                   | 37200 ± 1600     | 45032–38740               | Charcoal | Stewart et al. <sup>10</sup> |
| 8     | 11/85-90     | OxA-22964         | 35600 ± 450  | 41218–39160           | OxA-23035                   | 36250 ± 700      | 42076–39457               | Charcoal | Stewart et al. <sup>10</sup> |
| 8     | 11/90-95     | OxA-22839         | 34190 ± 390  | 39689–37613           | OxA-23033                   | 36700 ± 800      | 42525–39745               | Charcoal | Stewart et al. <sup>10</sup> |
| 8     | 11/95-100    | OxA-23029         | 34200 ± 750  | 40422–36629           | -                           | -                | -                         | Charcoal | Stewart et al. <sup>10</sup> |
| 9     | 12/100-105   | OxA-22791         | 33950 ± 700  | 39990–36475           | OxA-23034                   | 37300 ± 550      | 42568–40812               | Charcoal | Stewart et al. <sup>10</sup> |
| 10    | 18/110-115   | OxA-22792         | 34000 ± 700  | 40052–36521           | -                           | -                | -                         | Charcoal | Stewart et al. <sup>10</sup> |
| 12    | 15A          | OxA-23030         | 33200 ± 1200 | 40496–34963           | -                           | -                | -                         | Charcoal | Stewart et al. <sup>10</sup> |
| 14    | 17/160-165   | OxA-23031         | 34150 ± 650  | 40141–36770           | OxA-23036                   | 37550 ± 700      | 42964–40771               | Charcoal | Stewart et al. <sup>10</sup> |
| 19    | 20/180-185   | OxA-22794         | 37900 ± 750  | 43332–41022           | -                           | -                | -                         | Charcoal | Stewart et al. <sup>10</sup> |
| 20    | 21           | OxA-22793         | 42600 ± 1600 | 49587–43701           | -                           | -                | -                         | Charcoal | Stewart et al. <sup>10</sup> |

\* Calibrated with OxCal v. 4.2<sup>14</sup> using the latest SHCal13 calibration curve for the Southern Hemisphere<sup>15</sup>

**Table S2.** Optically stimulated luminescence (OSL) dates obtained from Carter trench at Melikane Rock-Shelter and relationship to adjacent Stewart/Dewar layers (after Stewart et al.<sup>10</sup>, Table 3).

| Carter Layer | Stewart/Dewar Layer equiv. | Sample code | Moisture content (%) | Dose rates (Gy/ka) |                    |                     | Total dose rate <sup>d,e</sup> | D <sub>e</sub> (Gy) <sup>f</sup> | Age model | Proportion (%) | Number of grains <sup>g</sup> | Overdisp. (%) <sup>h</sup> | OSL age (ka) <sup>i</sup> |                   |
|--------------|----------------------------|-------------|----------------------|--------------------|--------------------|---------------------|--------------------------------|----------------------------------|-----------|----------------|-------------------------------|----------------------------|---------------------------|-------------------|
|              |                            |             |                      | Beta <sup>a</sup>  | Gamma <sup>b</sup> | Cosmic <sup>c</sup> |                                |                                  |           |                |                               |                            |                           |                   |
| 1            | 2                          | MLK10       | 12 ± 2               | 1.20 ± 0.08        | 0.78 ± 0.02        | 0.09                | 2.11 ± 0.11                    | 6.7 ± 0.4                        | FMM1      | 29.3           | 112 / 1900                    | 70 ± 5                     | 3.2 ± 0.3                 |                   |
|              |                            |             |                      |                    |                    |                     |                                |                                  |           | FMM2           | <b>55.6</b>                   |                            |                           | <b>8.7 ± 0.7</b>  |
|              |                            |             |                      |                    |                    |                     |                                |                                  |           | FMM3           | 15.1                          |                            |                           | 22.7 ± 2.9        |
| 3            | 5                          | MLK9        | 13 ± 2               | 1.31 ± 0.08        | 0.93 ± 0.02        | 0.09                | 2.36 ± 0.13                    | 37.2 ± 1.4                       | FMM1      | 19.6           | 189 / 1000                    | 41 ± 3                     | 15.7 ± 1.1                |                   |
|              |                            |             |                      |                    |                    |                     |                                |                                  |           | FMM2           | <b>61.8</b>                   |                            |                           | <b>27.1 ± 1.8</b> |
|              |                            |             |                      |                    |                    |                     |                                |                                  |           | FMM3           | 18.6                          |                            |                           | 45.9 ± 3.6        |
| 4a           | 8                          | MLK8        | 19 ± 5               | 1.05 ± 0.09        | 1.07 ± 0.02        | 0.09                | 2.24 ± 0.14                    | 51.0 ± 4.5                       | FMM1      | 5.4            | 215 / 900                     | 26 ± 2                     | 22.8 ± 2.5                |                   |
|              |                            |             |                      |                    |                    |                     |                                |                                  |           | FMM2           | <b>66.0</b>                   |                            |                           | <b>41.3 ± 3.0</b> |
|              |                            |             |                      |                    |                    |                     |                                |                                  |           | FMM3           | 28.6                          |                            |                           | 60.6 ± 4.9        |
| 5 (upper)    | 14                         | MLK6        | 19 ± 5               | 1.41 ± 0.10        | 0.91 ± 0.02        | 0.09                | 2.45 ± 0.16                    | 61.8 ± 4.8                       | FMM1      | 8.0            | 157 / 1000                    | 29 ± 2                     | 25.2 ± 2.6                |                   |
|              |                            |             |                      |                    |                    |                     |                                |                                  |           | FMM2           | <b>61.4</b>                   |                            |                           | <b>45.9 ± 3.8</b> |
|              |                            |             |                      |                    |                    |                     |                                |                                  |           | FMM3           | 30.6                          |                            |                           | 66.5 ± 6.2        |
| 5 (lower)    | 16                         | MLK5        | 19 ± 5               | 1.37 ± 0.09        | 0.81 ± 0.02        | 0.09                | 2.30 ± 0.15                    | <b>123.6 ± 8.1</b>               | FMM1      | <b>66.4</b>    | 225 / 900                     | 28 ± 2                     | <b>53.8 ± 3.2</b>         |                   |
|              |                            |             |                      |                    |                    |                     |                                |                                  |           | FMM2           | 33.6                          |                            |                           | 81.4 ± 12.2       |
| 6 (upper)    | 20                         | MLK4        | 19 ± 2               | 1.15 ± 0.03        | 0.69 ± 0.04        | 0.08                | 1.95 ± 0.05                    | <b>97.4 ± 1.8</b>                | CAM       | 100            | 103 / 800                     | 14 ± 2                     | <b>50.0 ± 1.9</b>         |                   |
| 6 (central)  | 23                         | MLK3        | 19 ± 2               | 1.21 ± 0.03        | 0.78 ± 0.04        | 0.08                | 2.10 ± 0.05                    | <b>128.1 ± 3.0</b>               | CAM       | 100            | 64 / 1000                     | 9 ± 3                      | <b>61.0 ± 2.5</b>         |                   |
| 6 (lower)    | 28                         | MLK2        | 19 ± 2               | 1.33 ± 0.04        | 0.87 ± 0.05        | 0.08                | 2.31 ± 0.06                    | <b>183.7 ± 3.8</b>               | FMM1      | 97             | 251 / 1000                    | 25 ± 2                     | <b>79.5 ± 3.1</b>         |                   |
|              |                            |             |                      |                    |                    |                     |                                |                                  |           | FMM2           | 3                             |                            |                           | 30.3 ± 5.9        |
| 7            | 30                         | MLK1        | 19 ± 5               | 1.60 ± 0.12        | 0.92 ± 0.03        | 0.08                | 2.63 ± 0.17                    | <b>218.8 ± 7.3</b>               | CAM       | <b>100</b>     | 40 / 1000                     | 21 ± 5                     | <b>83.2 ± 6.2</b>         |                   |

- <sup>a</sup> Measurements made on sub-samples of dried, homogenised and powdered samples by GM-25-5 beta counting. Dry dose rates calculated from these activities were adjusted for the estimated long-term water content and for the effects of grain size and hydrofluoric acid etching on beta dose attenuation<sup>16,17</sup>.
- <sup>b</sup> Measurements made using *in situ* gamma spectrometry. The measured (field) dose rates were adjusted for the water content. The field moisture contents ranged between 12 and 25%. Ages increase by ~1% for each 1% increase in water content.
- <sup>c</sup> Cosmic-ray dose rates have been calculated using the equations provided by Prescott and Hutton<sup>18</sup>, taking into account site latitude (-29.6 °S), longitude (28.8 °E) and altitude (1850 m). We have also accounted for the density and thickness of overlying sandstone roof and sediment overburden, and for the cos<sup>2</sup>-Φ zenith angle dependence of cosmic rays<sup>19</sup>. Dry dose rates were also adjusted for water content<sup>20</sup>.
- <sup>d</sup> Mean ± total uncertainty (68% confidence interval), calculated as the quadratic sum of the random and systematic uncertainties.
- <sup>e</sup> Includes an assumed internal alpha dose rate of 0.03 ± 0.01 Gy/ka.
- <sup>f</sup> Estimated from single grains of quartz using the Finite Mixture Model (FMM) or Central Age Model (CAM).
- <sup>g</sup> Number of individual grains used for D<sub>e</sub> determination / total number of grains analysed.
- <sup>h</sup> Overdispersion, the relative standard deviation of the D<sub>e</sub> distribution after allowing for measurement uncertainties<sup>21</sup>.
- <sup>i</sup> Total uncertainty includes a systematic component of ± 2% for possible bias associated with laboratory beta-source calibration.



**Figure S2.** Section drawing of Melikane stratigraphic sequence – west wall of the AMEMSA trench.

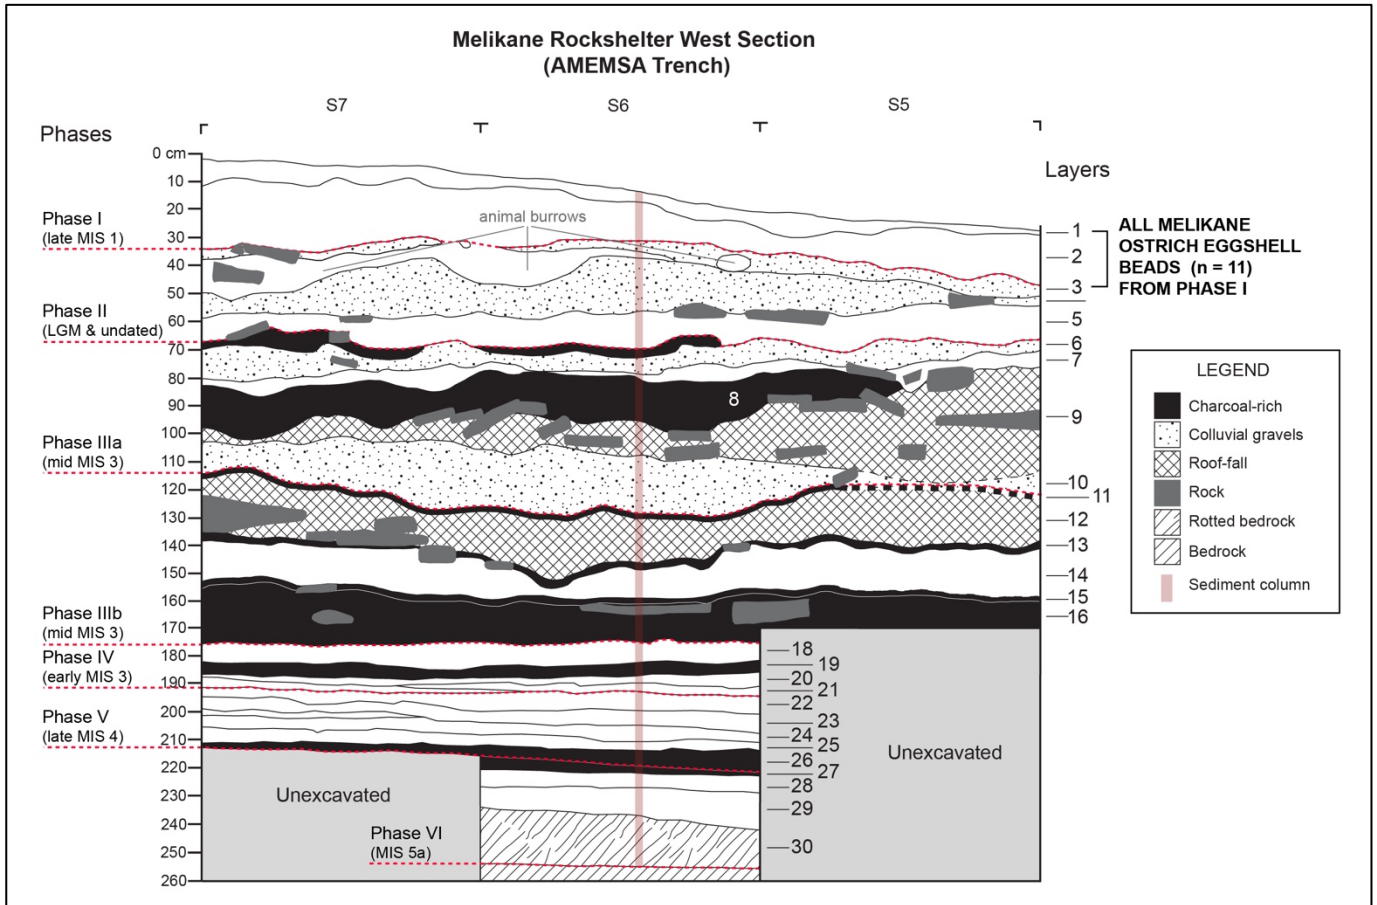

Figure S3. Photographs of ostrich eggshell beads sampled from Melikane.

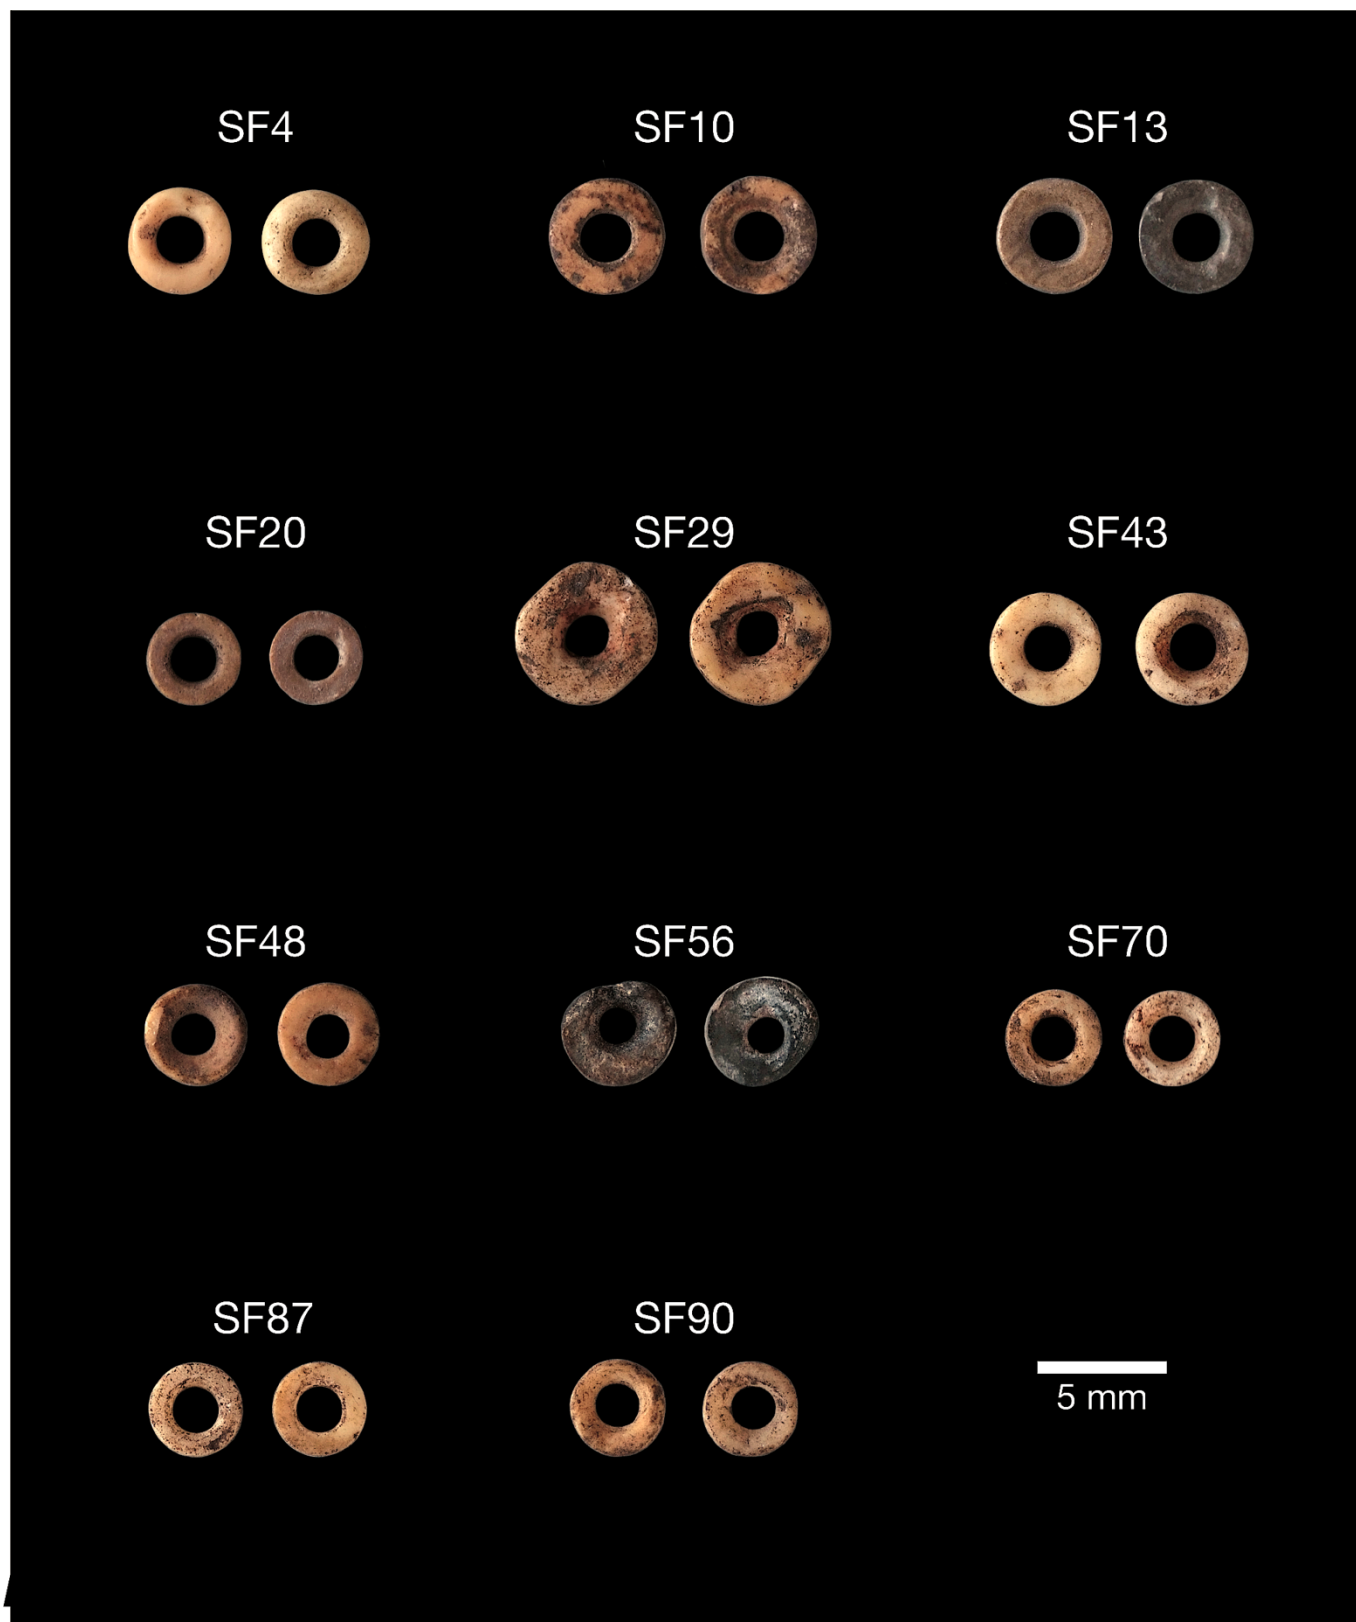

## 2. Research history, excavation methods, and chronostratigraphic details for Sehonghong Rock-Shelter

### *2.1. Research history*

Sehonghong (1800 m a.s.l.) is the largest rockshelter along the upper reaches of Lesotho's Senqu (Orange) River. Similar to Melikane, the site is formed in Clarens sandstones and located along another major eastern tributary of the Senqu (the Sehonghong River). The shelter's position within the valley differs from Melikane, however, since it is situated only roughly five meters above the valley floor. Its rich, though now poorly conserved, series of rock paintings includes a well-known scene showing the capture of two 'rain-animals' first recorded by Joseph Orpen<sup>5</sup>. One of only three scenes interpreted by a Bushman informant from a population still engaged in producing paintings, these images, like those at Melikane, played a critical part in developing current understandings of southern African hunter-gatherer rock art<sup>22</sup>. The site was inhabited by Bushmen until shortly before Orpen's 1873 visit and then again by a few Bushman individuals until the dawn of the twentieth century<sup>23,24</sup>.

Sehonghong was first excavated in 1971 by Patrick Carter, who removed the deposit to bedrock in its most sheltered, northeastern corner, uncovering a sequence of Middle Stone Age (MSA) and Later Stone Age (LSA) occupations extending from about 59 kya<sup>9</sup> into the second millennium AD<sup>6,25,26</sup>. However, because his excavations employed 10 cm-thick horizontal spits that cut across the site's natural stratigraphy, the site's LSA sequence (spanning Marine Isotope Stage (MIS) 2 and the Holocene) was subsequently re-investigated in 1992 by Peter Mitchell (University of Oxford, UK) (Figure S4)<sup>27</sup>. Current excavations by Brian Stewart (University of Michigan, USA) and Genevieve Dewar (University of Toronto, Canada) are extending this excavation down into underlying MSA layers (Figure S4)<sup>28</sup>. All beads analyzed in this study come from the Mitchell and Stewart/Dewar excavations.

### *2.2. Excavation methods*

Mitchell's 1992 excavations employed observable distinctions in their color, texture and inclusions to remove individual sedimentary contexts following the site's natural stratigraphy. Excavation ceased on reaching a rockfall event known from Carter's<sup>6</sup> earlier work to date to close to the boundary between MIS 2 and 3. All excavated deposit was sieved through a 1.5 mm mesh on-site, except for that from the uppermost horizons, DC and SS (Table S3, Figure S5), for which a 3 mm mesh was employed. Finds were sorted on-site and artifacts subsequently analyzed at the Department of Archaeology, University of Cape Town, South Africa. A total of 523 ostrich eggshell beads was retrieved, along with 23 fragments (5.2 g) of unworked ostrich eggshell. Fifteen of these beads were analyzed in this study. Bones attributable to ostrich were restricted to the mid-Holocene layers ALP and GWA (a long bone shaft and a femur head respectively) and the immediately pre-Last Glacial Maximum layer BAS (a wing bone)<sup>29</sup>.

Stewart and Dewar's excavations have continued downward within the same trench as that excavated by Mitchell, investigating the MSA levels that form the bottom three-fifths of Sehonghong's deposits. Sedimentary contexts were again removed following observable differences in soil color, texture and inclusions. All artifacts  $\geq 2.5$  cm in maximum dimension were individually piece-plotted and all sediments sieved through a 1.5 mm mesh. Bucket flotation was used for sediments from features and other visibly organic-rich deposits in order to obtain larger charcoal and macrobotanical assemblages. Though specialists from a range of institutions are working on various assemblages, most artifacts are being analyzed at either the Museum of Anthropological Archaeology, University of Michigan (where they are also temporarily curated) or the Department of Anthropology, University of Toronto Scarborough. A small number of ostrich eggshell beads have been retrieved from the MSA levels excavated to date. One, recovered *in situ* as a

plotted artifact in Context 170 (bracketed 33.7–31.9 ka), was included in this study, bringing the total number of ostrich eggshell beads analyzed from Sehonghong to 16 (Figure S6).

### 2.3. Chronostratigraphy

The deposit excavated at Sehonghong in 1992 comprised a total of 174 separate stratigraphic contexts that were subsequently grouped together into 13 layers for the purposes of analysis (Table S3, Figure S5)<sup>30–33</sup>. Where recent application of AMS <sup>14</sup>C dating to some of these contexts suggests that they should be reassigned to a different layer this is noted below. Table S3 lists all available radiocarbon dates available for the Mitchell/Stewart/Dewar trench. From top to bottom the layers recognized in the 1992 excavation are:

#### SS (Surface Scrapings)

Loose grey-brown dust lying on the site's surface with a high modern dung content, plus occasional maize cobs, peach stones, and pieces of paper. LSA artefacts are few and clearly derive from immediately underlying layers.

#### DC (Dung Crust)

A hard, friable, grey layer mostly consisting of cattle (and some horse) dung, coming away in large lumps, but much finer and ashier with markedly less dung toward the base. Four radiocarbon dates suggest that much of the material present may derive from a time-limited horizon c. 1.25-1.13 kya<sup>32,34</sup>, although the layer clearly continued to accumulate into the nineteenth, and likely twentieth, centuries.

#### GAP (Grey Ash with Pottery)

A soft, loose, light grey, charcoal-rich ashy layer found only in the western half of the 1992 trench. A pit formerly assigned to this layer and associated with charcoal yielding a date of 1240 ± 50 BP (Pta-6084) is now considered to be part of DC. Two further radiocarbon dates place GAP in the early/mid-portion of the first millennium cal. AD.

#### GWA (Grey White Ash)

A series of quite firm white to pinkish-white ashy bodies with high charcoal content that are probably the remains of interlensing hearths. Present only in the eastern half of the 1992 excavation, GWA is dated on charcoal to 6.9-6.6 kya<sup>33</sup>, but a bone date from Layer DC of 6.7-6.5 kya must also derive from GWA, with the sample in question having been displaced upward<sup>34</sup>.

#### ALP (Ashy Loams with Plants)

A series of predominantly reddish-brown or black ashy contexts, many containing partly humified plant remains, some with a distinctly more ash-rich content, especially toward the layer's base and the rockshelter's rear wall. Four conventional radiocarbon dates date ALP to 8.3-7.7 kya,

#### SA (Sandy Ash)

Mottled orange-brown sandy contexts, most strongly developed toward the western, front end of the excavation, whereas firmer, white ashy contexts occur toward the rear. The topmost contexts of this layer were partially calcreted and constitute a clear break with the base of Layer ALP. The layer is dated to 11.6-10.3 kya.

#### BARF (Beige Ash above Rock Fall)

A thin, beige-coloured ash containing partly decayed fine grass material interpreted as bedding and found only in the western end of the excavation trench. BARF's single radiocarbon date has an unhelpfully wide standard error, indicating that its age is most likely 13.4-12.6 kya.

#### RF (Rock Fall)

This layer contains a high number of sandstone fragments derived from at least three rockfall events that probably took place in close succession and are interstratified with a black, organic-rich soil with excellent macroplant preservation. AMS dates place Layer RF at 14.9-13.8 kya, consistent with a conventional date from the 1992 excavation and two dates on bone from Carter's 1971 excavation. Two conventional dates previously attributed to the underlying layer RBL/CLBRF from the 1992 excavation (Pta-6058, Pta-6062) are now reassigned to RF.

#### RBL/CLBRF (Red Brown Loam/Carbonaceous Loams Below Rock Fall)

This layer comprises a brown, compost-like light loamy soil with a high macroplant content but few sandstone inclusions and a series of ashy, sometimes very charcoal-rich contexts present only at the eastern (rear) end of the excavation. Two AMS dates bracket this layer at 15.7-15.2 kya, with older charcoal and bone determinations from Carter's excavation having much larger standard errors.

#### BAS (Brown Ashy Sand)

A fine, loose, grey/brown, ashy sand, the bulk of which likely dates to 24.7-22.8 kya, but with evidence of at least two minor subsequent occupation events after the Last Glacial Maximum around 22.3-20.8 kya and 19.3-18.6 kya.

#### OS (Orange Sand)

A thin, almost culturally sterile orange sand with a high number of small sandstone roof spalls that is the direct equivalent to Layer VIII of Carter's excavation. A radiocarbon date of 20,100 ± 90 BP (OxA-32917) brackets OS at 24.4-23.9 kya, although a second AMS date (OxA-32916) is clearly and inexplicably out of sequence.

#### MOS (Mottled Orange Sand)

A series of brown to orange sandy contexts, some with small sandstone spall inclusions, that have extensive darker brown or black mottling derived from the presence of charcoal or decayed macroplant remains. This layer corresponds directly to Layer VII of Carter's excavation. MOS is dated to 25.3-23.8 kya, but recently obtained AMS dates suggest that this bracket may be rather tighter at 25.0-24.1 kya.

#### RFS (Rock Fall with Sand)

A major episode of roof collapse associated with numerous, thin sandstone spalls and angular rocks, mostly <40 cm in maximum size, many of them partially coated with a thin gypsum precipitate that is also found on sandstone inclusions in MOS and OS. This layer equates to Carter's Layer VI and marks the base of the 1992 excavation. Three radiocarbon determinations date RFS to 30.9-28.5 kya.

**Figure S4.** Site photographs of Mitchell 1992 and Stewart/Dewar 2009–15 (AMEMSA) excavations at Sehonghong. **a)** Excavation in process of Layer RFS (early MIS 2/late MIS 3). **b)** Section drawing of northern wall in progress near completion of 2009 AMEMSA season. **c)** Mitchell/Stewart/Dewar trench at completion of 2009 AMEMSA season (Carter 1971 trench located beneath spoil heap).

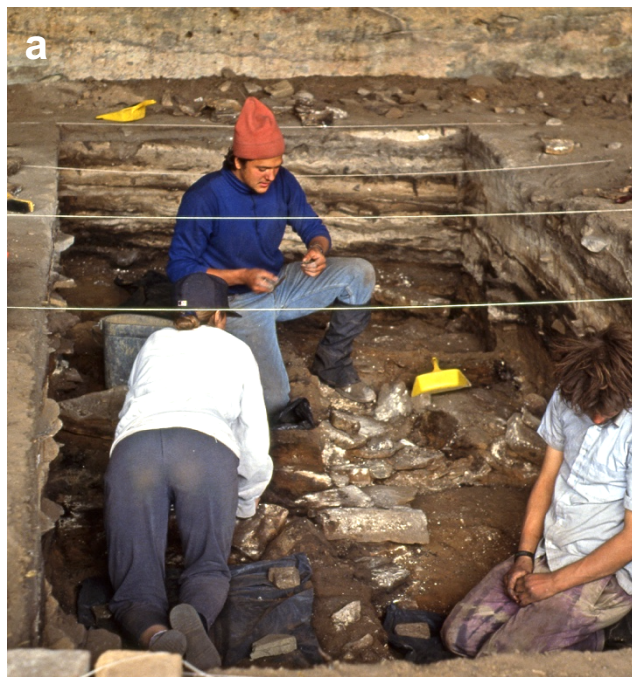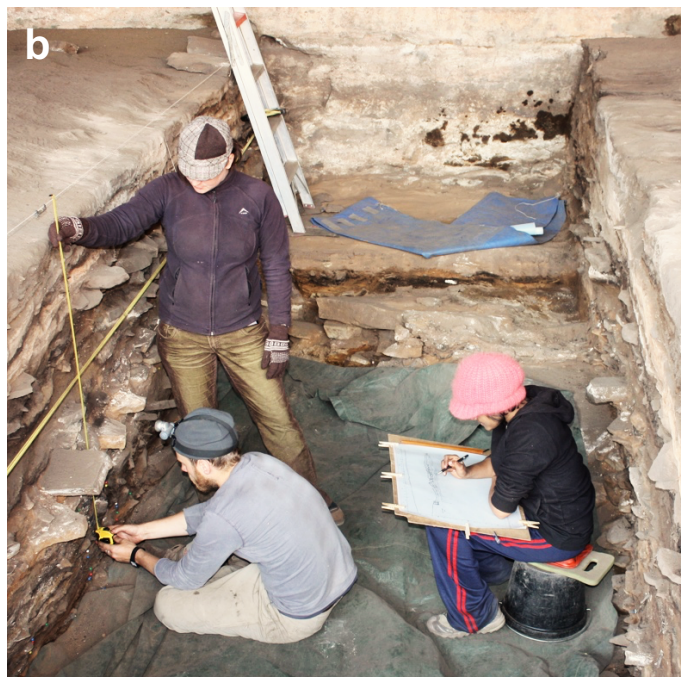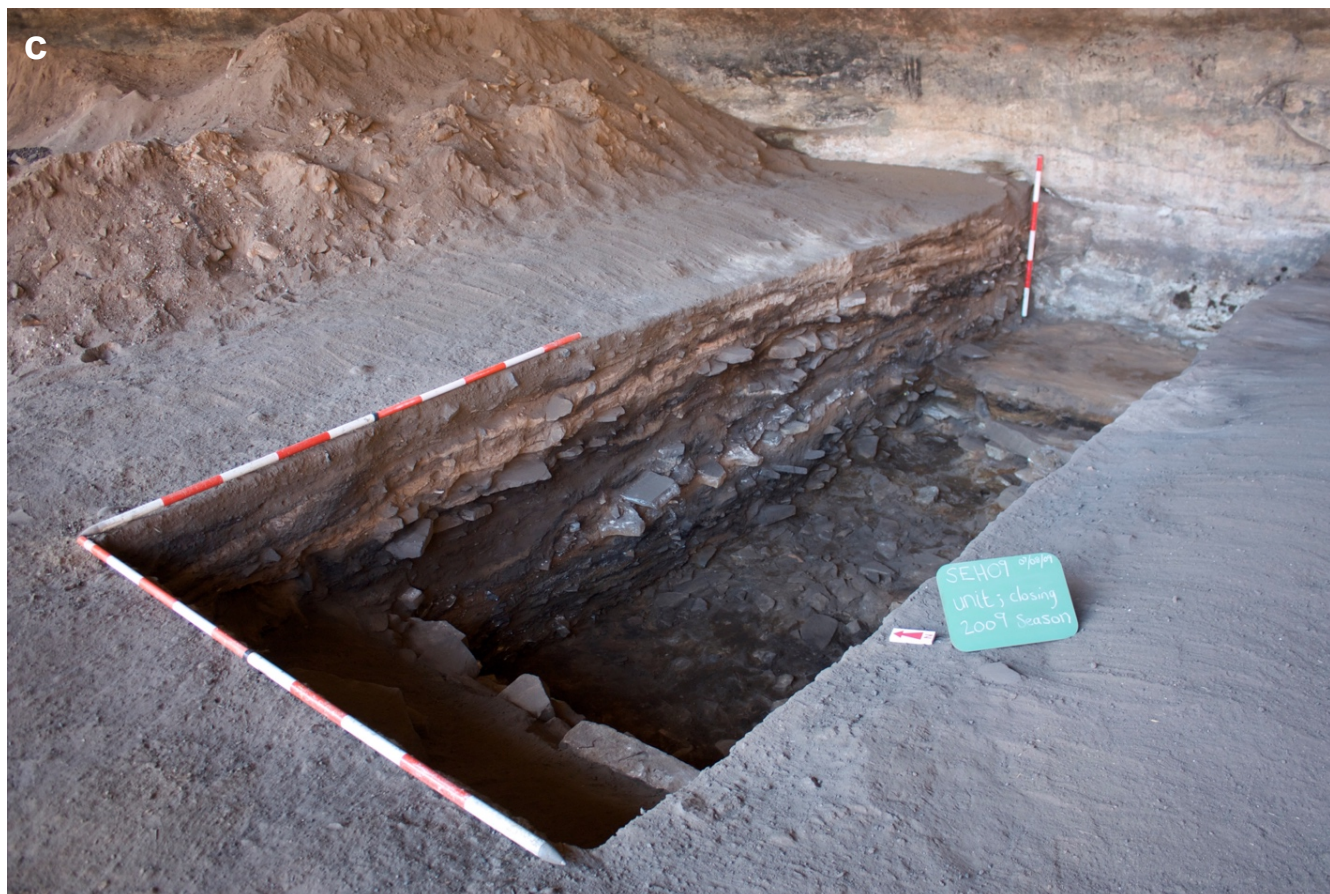

**Table S3.** Radiocarbon dates obtained from Mitchell and Stewart/Dewar excavations at Sehonghong Rock-Shelter.

| Layer      | Context | Laboratory number | 14C BP      | Cal. BP* (95.4 %) | Material | Reference                      |
|------------|---------|-------------------|-------------|-------------------|----------|--------------------------------|
| DC         | 011     | Wk-34785          | 1132 ± 25   | 1057–933          | Bone     | Horsburgh et al. <sup>34</sup> |
| DC         | 011     | Wk-34786          | 1132 ± 25   | 1057–933          | Bone     | Horsburgh et al. <sup>34</sup> |
| DC         | 011     | Wk-34784          | 1201 ± 25   | 1173–974          | Bone     | Horsburgh et al. <sup>34</sup> |
| DC         | 017     | Pta-6084          | 1240 ± 50   | 1265–980          | Charcoal | Mitchell <sup>32</sup>         |
| GAP        | 013     | Pta-6063          | 1710 ± 20   | 1691–1528         | Charcoal | Mitchell <sup>32</sup>         |
| DC         | 011     | Wk-34787          | 5870 ± 25   | 6736–6537         | Bone     | Horsburgh et al. <sup>34</sup> |
| GWA        | 001     | Pta-6154          | 5950 ± 70   | 6931–6548         | Charcoal | Mitchell <sup>33</sup>         |
| ALP        | 006     | Pta-6278          | 7290 ± 80   | 8297–7879         | Charcoal | Mitchell <sup>33</sup>         |
| ALP        | 014     | Pta-6280          | 7090 ± 80   | 8007–7697         | Charcoal | Mitchell <sup>33</sup>         |
| ALP        | 022     | Pta-6072          | 7210 ± 80   | 8173–7839         | Charcoal | Mitchell <sup>33</sup>         |
| ALP        | 117     | Pta-6083          | 7010 ± 70   | 7942–7671         | Charcoal | Mitchell <sup>33</sup>         |
| SA         | 119     | Pta-6368          | 9280 ± 45   | 10550–10255       | Charcoal | Mitchell <sup>33</sup>         |
| SA         | 062     | Pta-6057          | 9740 ± 140  | 11595–10588       | Charcoal | Mitchell <sup>33</sup>         |
| BARF       | 064     | Pta-6065          | 11090 ± 230 | 13395–12559       | Charcoal | Mitchell <sup>33</sup>         |
| RF         | 069     | OxA-32926         | 12010 ± 50  | 14018–13773       | Charcoal | Pargeter et al. <sup>35</sup>  |
| RF         | 065     | Pta-6282          | 12180 ± 110 | 14467–13731       | Charcoal | Mitchell <sup>31</sup>         |
| RF         | 065     | OxA-32925         | 12355 ± 50  | 14712–14116       | Charcoal | Pargeter et al. <sup>35</sup>  |
| RF         | 065     | OxA-32924         | 12420 ± 50  | 14877–14183       | Charcoal | Pargeter et al. <sup>35</sup>  |
| RF         | 090     | Pta-6062          | 12410 ± 45  | 14735–14125       | Charcoal | Mitchell <sup>31</sup>         |
| RF         | 097     | Pta-6058          | 12470 ± 100 | 15040–14137       | Charcoal | Mitchell <sup>31</sup>         |
| RBL/CLBRF  | 072     | OxA-32923         | 12870 ± 55  | 15601–15163       | Charcoal | Pargeter et al. <sup>35</sup>  |
| RBL/CLBRF  | 072     | OxA-32922         | 12690 ± 55  | 15725–15274       | Charcoal | Pargeter et al. <sup>35</sup>  |
| BAS        | 100     | Pta-6060          | 15700 ± 150 | 19298–18600       | Charcoal | Mitchell <sup>31</sup>         |
| BAS        | 096A    | Pta-6281          | 19400 ± 200 | 23853–22824       | Charcoal | Mitchell <sup>31</sup>         |
| BAS        | 126     | Pta-6077          | 20200 ± 100 | 24495–23952       | Charcoal | Mitchell <sup>31</sup>         |
| BAS        | 126     | OxA-32920         | 20270 ± 100 | 24648–24022       | Charcoal | Pargeter et al. <sup>35</sup>  |
| OS         | 127     | OxA-32917         | 20100 ± 90  | 24420–23914       | Charcoal | Pargeter et al. <sup>35</sup>  |
| MOS        | 137     | OxA-32919         | 20290 ± 90  | 24656–24058       | Charcoal | Pargeter et al. <sup>35</sup>  |
| MOS        | 137     | OxA-32918         | 20460 ± 100 | 25019–24287       | Charcoal | Pargeter et al. <sup>35</sup>  |
| MOS        | 137     | Pta-6059          | 20500 ± 230 | 25272–24061       | Charcoal | Mitchell <sup>30</sup>         |
| RFS        | 136     | Pta-6271          | 25100 ± 300 | 29890–28466       | Charcoal | Mitchell <sup>30</sup>         |
| RFS        | 136     | OxA-32915         | 25510 ± 150 | 30191–29206       | Charcoal | Pargeter et al. <sup>35</sup>  |
| RFS        | 136     | OxA-32914         | 25870 ± 160 | 30615–26595       | Charcoal | Pargeter et al. <sup>35</sup>  |
| RFS        | 136     | Pta-6268          | 26000 ± 430 | 30983–29243       | Charcoal | Mitchell <sup>30</sup>         |
| Unassigned | 162     | OxA-27689         | 25330 ± 130 | 29706–28692       | Charcoal | Loftus et al. <sup>28</sup>    |
| Unassigned | 163     | OxA-27690         | 28650 ± 200 | 33148–31867       | Charcoal | Loftus et al. <sup>28</sup>    |
| Unassigned | 167     | OxA-27691         | 29120 ± 190 | 33737–32804       | Charcoal | Loftus et al. <sup>28</sup>    |
| Unassigned | 169     | OxA-27692         | 29170 ± 190 | 33769–32858       | Charcoal | Loftus et al. <sup>28</sup>    |
| Unassigned | 1030    | OxA-27693         | 29200 ± 200 | 33801–32870       | Charcoal | Loftus et al. <sup>28</sup>    |
| Unassigned | 1031    | OxA-27694         | 28800 ± 190 | 33517–32197       | Charcoal | Loftus et al. <sup>28</sup>    |
| Unassigned | 1036    | OxA-27695         | 30910 ± 250 | 35332–34273       | Charcoal | Loftus et al. <sup>28</sup>    |
| Unassigned | 1037    | OxA-29696         | 31030 ± 250 | 35482–34417       | Charcoal | Loftus et al. <sup>28</sup>    |
| Unassigned | 1111A   | OxA-27696         | 30710 ± 240 | 35063–34127       | Charcoal | Loftus et al. <sup>28</sup>    |

\* Calibrated with OxCal v. 4.2<sup>14</sup> using the latest SHCal13 calibration curve for the Southern Hemisphere<sup>15</sup>

**Figure S5.** Section drawing of Sehonghong stratigraphic sequence – south wall of Mitchell/AMEMSA trench (modified after Mitchell<sup>27</sup>, Fig. 2).

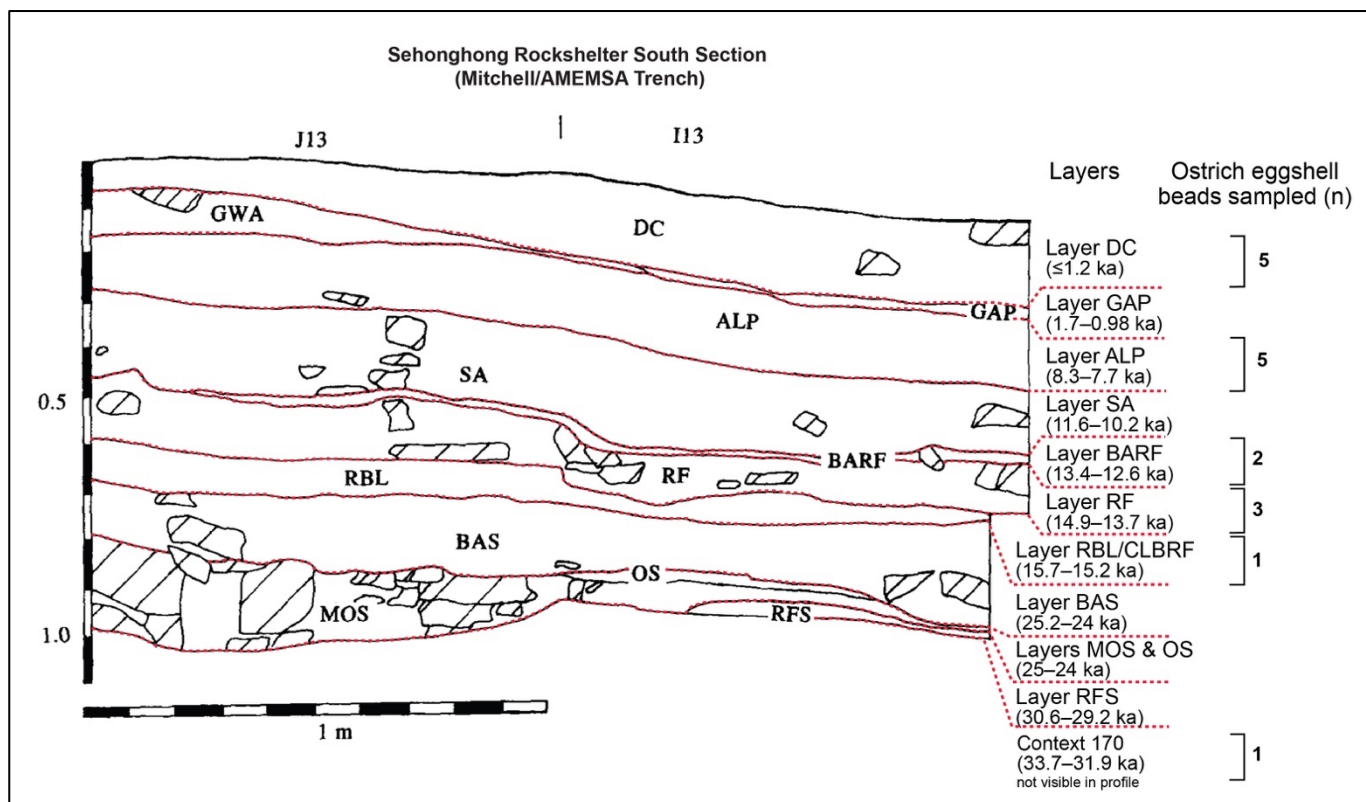



**Figure S6.** Photographs of ostrich eggshell beads sampled from Sehonghong

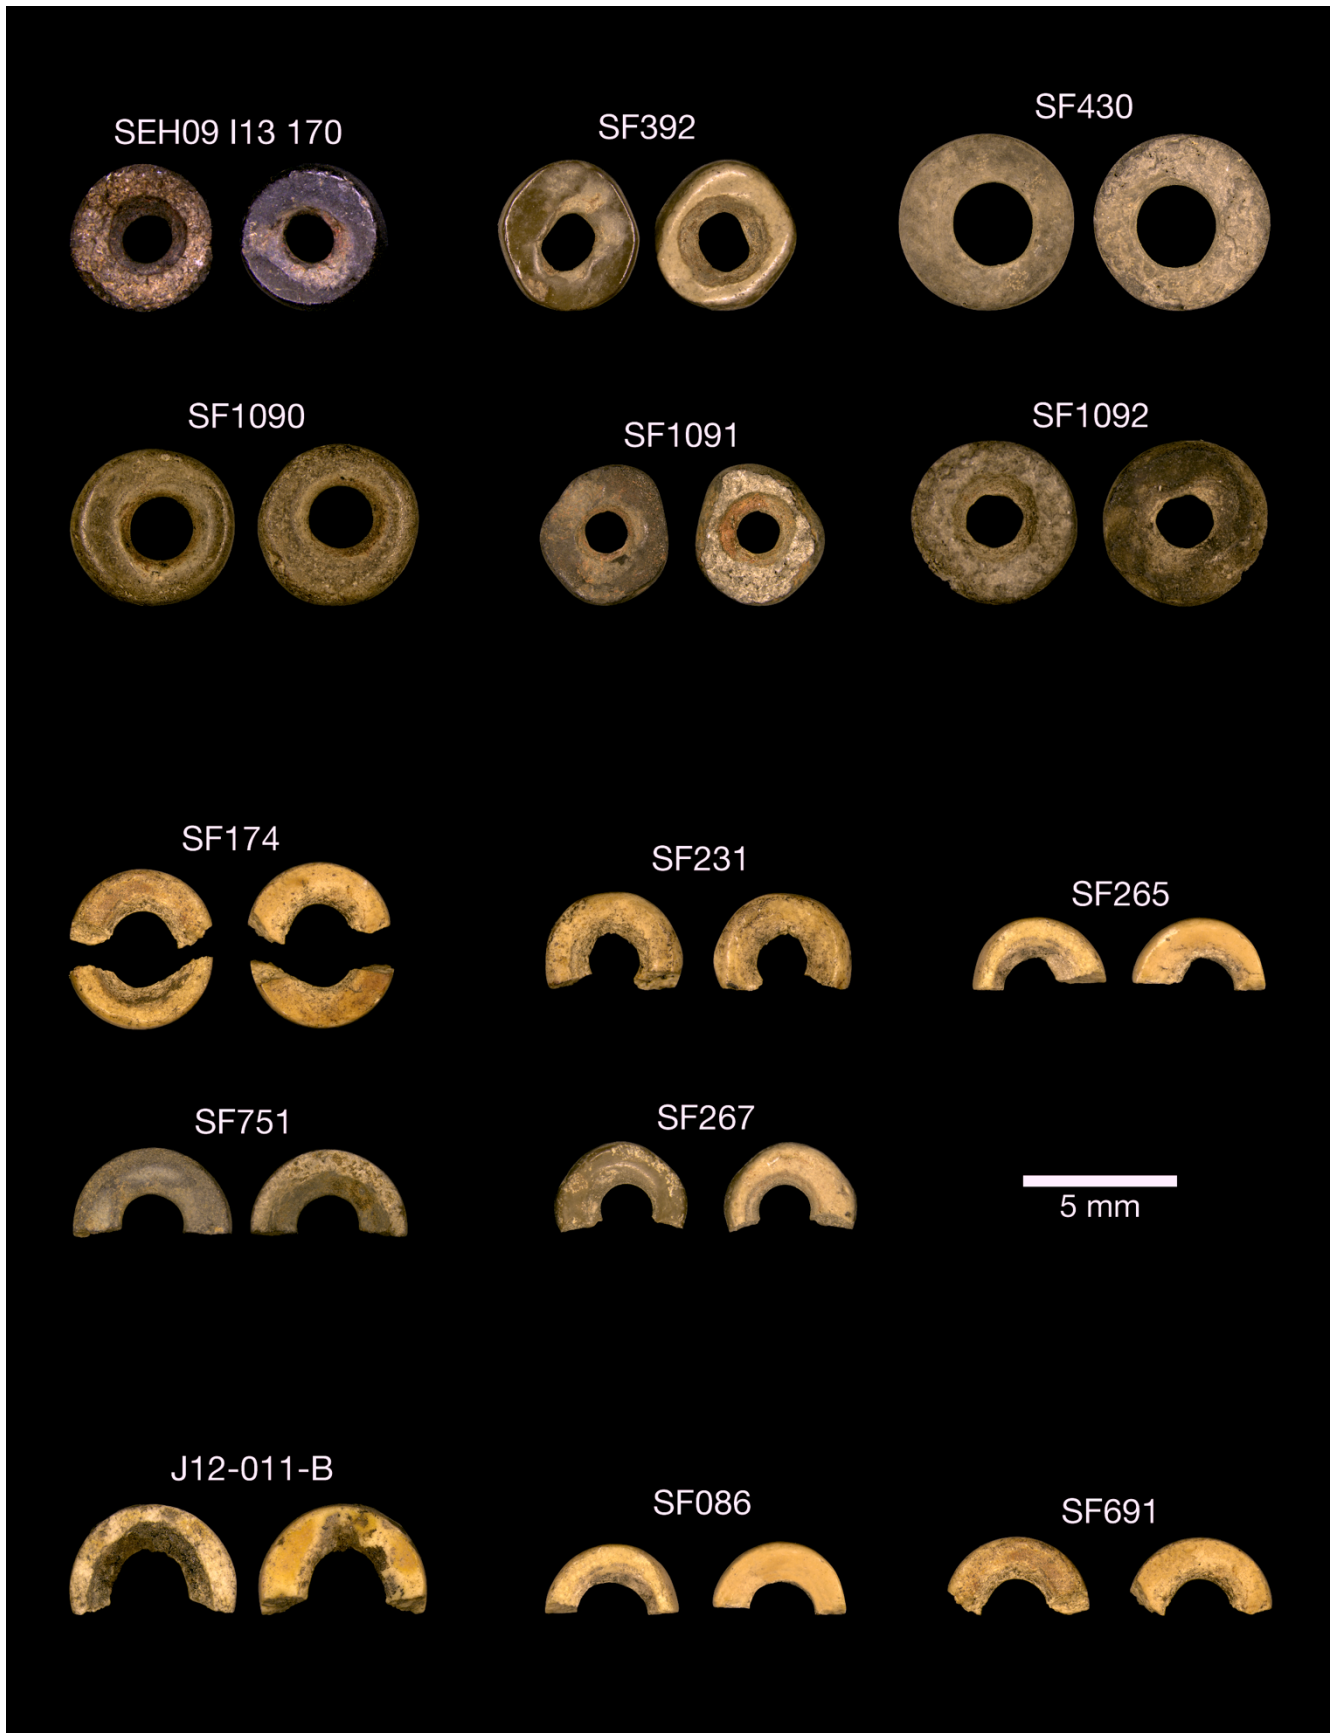

**Table S4.** Codes, details, and Sr isotopic compositions of samples employed to generate the highland baseline.

| Sample code                                 | Taxon                         | Locality/River    | District/Province* | Lithology‡ | <sup>87</sup> Sr/ <sup>86</sup> Sr† | 2SE ±       | %2SE ±      |
|---------------------------------------------|-------------------------------|-------------------|--------------------|------------|-------------------------------------|-------------|-------------|
| <b>Soils extracts</b>                       |                               |                   |                    |            |                                     |             |             |
| S1.1                                        | -                             | Sehonghong        | Thaba-Tseka        | Dr, Cl     | 0.707969                            | 0.000016    | 0.0023%     |
| S7.1                                        | -                             | Sehonghong        | Thaba-Tseka        | Dr         | 0.709800                            | 0.000014    | 0.0019%     |
| S14.1                                       | -                             | Sehonghong        | Thaba-Tseka        | Dr, Cl     | 0.707729                            | 0.000014    | 0.0020%     |
| S15.1                                       | -                             | Khomo-ea-Mollo    | Thaba-Tseka        | Cl         | 0.710071                            | 0.000012    | 0.0017%     |
| S17.1                                       | -                             | Khomo-ea-Mollo    | Thaba-Tseka        | Cl         | 0.711644                            | 0.000009    | 0.0013%     |
| S19.1                                       | -                             | Sehonghong        | Thaba-Tseka        | Dr         | 0.708752                            | 0.000014    | 0.0019%     |
| S26.1                                       | -                             | Khomo-ea-Mollo    | Thaba-Tseka        | Cl         | 0.712386                            | 0.000012    | 0.0017%     |
| S28.1                                       | -                             | Khomo-ea-Mollo    | Thaba-Tseka        | Cl         | 0.712696                            | 0.000017    | 0.0024%     |
| S31.1                                       | -                             | Khomo-ea-Mollo    | Thaba-Tseka        | Cl         | 0.713272                            | 0.000015    | 0.0021%     |
| <b>Plants</b>                               |                               |                   |                    |            |                                     |             |             |
| V107                                        | <i>Themeda triandra</i>       | Khomo-ea-Mollo    | Thaba-Tseka        | Cl         | 0.712404                            | 0.000013    | 0.0018%     |
| V108                                        | <i>Themeda triandra</i>       | Khomo-ea-Mollo    | Thaba-Tseka        | Cl         | 0.713681                            | 0.000016    | 0.0022%     |
| V109                                        | <i>Themeda triandra</i>       | Khomo-ea-Mollo    | Thaba-Tseka        | Cl         | 0.713089                            | 0.000016    | 0.0022%     |
| V110                                        | <i>Themeda triandra</i>       | Khomo-ea-Mollo    | Thaba-Tseka        | Cl         | 0.712713                            | 0.000029    | 0.0041%     |
| V144                                        | <i>Themeda triandra</i>       | Sehonghong        | Thaba-Tseka        | Dr         | 0.710648                            | 0.000014    | 0.0020%     |
| V145                                        | <i>Themeda triandra</i>       | Sehonghong        | Thaba-Tseka        | Dr         | 0.710105                            | 0.000015    | 0.0021%     |
| V146                                        | <i>Themeda triandra</i>       | Sehonghong        | Thaba-Tseka        | Dr         | 0.710024                            | 0.000018    | 0.0025%     |
| V148                                        | <i>Themeda triandra</i>       | Sehonghong        | Thaba-Tseka        | Dr         | 0.709536                            | 0.000016    | 0.0023%     |
| V151                                        | <i>Themeda triandra</i>       | Sehonghong        | Thaba-Tseka        | Dr         | 0.708713                            | 0.000026    | 0.0037%     |
| <b>Small mammals (tooth enamel)</b>         |                               |                   |                    |            |                                     |             |             |
| NMB6667                                     | <i>Rhabdomys pumilio</i>      | Sehlabathebe N.P. | Qacha's Nek        | Cl         | 0.712061                            | 0.000006    | 0.0009%     |
| NMB6937                                     | <i>Micaelamys namaquensis</i> | Mateanong         | Mokhotlong         | Dr         | 0.708523                            | 0.000026    | 0.0037%     |
| NMB7331                                     | <i>Rhabdomys pumilio</i>      | Marakabei         | Maseru             | Dr         | 0.708159                            | 0.000008    | 0.0011%     |
| NMB8166                                     | <i>Otomys irroratus</i>       | Bokong            | Thaba-Tseka        | Dr         | 0.711607                            | 0.000009    | 0.0013%     |
| NMB8202                                     | <i>Micaelamys namaquensis</i> | Mount Moorosi     | Quthing            | Cl         | 0.715352                            | 0.000011    | 0.0016%     |
| NMB8357                                     | <i>Otomys irroratus</i>       | Oxbow Ski Lodge   | Butha-Buthe        | Dr         | 0.708785                            | 0.000008    | 0.0011%     |
| NMB8427                                     | <i>Micaelamys namaquensis</i> | Moqotoane         | Thaba-Tseka        | Dr         | 0.707811                            | 0.000001    | 0.0014%     |
| NMB8641                                     | <i>Micaelamys namaquensis</i> | Botsoela          | Mafeteng           | Dr         | 0.709177                            | 0.000009    | 0.0013%     |
| <b>Water (from de Villiers et al. 2000)</b> |                               |                   |                    |            |                                     |             |             |
| U8                                          | -                             | Orange-Senqu      | Thaba-Tseka        | Dr         | 0.70811                             | Unpublished | Unpublished |
| U7                                          | -                             | Orange-Senqu      | Thaba-Tseka        | Dr         | 0.70824                             | "           | "           |
| U5                                          | -                             | Orange-Senqu      | Thaba-Tseka        | Dr         | 0.70837                             | "           | "           |
| U4                                          | -                             | Senqunyane        | Maseru             | Dr         | 0.70853                             | "           | "           |
| OV16(1)                                     | -                             | Orange-Senqu      | Mohale's Hoek      | Dr, Cl, El | 0.71232                             | "           | "           |
| OV16(2)                                     | -                             | Orange-Senqu      | Mohale's Hoek      | Dr, Cl, El | 0.7116                              | "           | "           |
| OV17                                        | -                             | Orange-Senqu      | Mohale's Hoek      | Dr, Cl, El | 0.70872                             | "           | "           |
| OV18                                        | -                             | Orange-Senqu      | Quthing            | Dr, Cl, El | 0.70904                             | "           | "           |
| OV19                                        | -                             | Orange-Senqu      | E. Cape (SA)       | Dr, Cl, El | 0.71229                             | "           | "           |
| OV9                                         | -                             | Caledon           | Butha-Buthe        | Dt, Cl, El | 0.70903                             | "           | "           |
| OV10                                        | -                             | Caledon           | Butha-Buthe        | Dt, Cl, El | 0.7091                              | "           | "           |
| OV12                                        | -                             | Caledon           | Leribe             | Dt, Cl, El | 0.7107                              | "           | "           |
| OV14                                        | -                             | Caledon           | Leribe             | Dt, Cl, El | 0.71171                             | "           | "           |
| OV15                                        | -                             | Caledon           | Berea              | Dt, Cl, El | 0.71141                             | "           | "           |
| OV11                                        | -                             | Semena            | Butha-Buthe        | Dr, Cl     | 0.70887                             | "           | "           |

\* All in Lesotho except those specified 'SA' (South Africa).

‡ Lithology codes: Dr: Drakensberg Group; Dt: Intrusive dolerites; Cl: Clarens Formation; El: Elliot Formation; Mt: Molteno Formation.

† Mean value for the Sr standard NBS 987:

<sup>87</sup>Sr/<sup>86</sup>Sr = 0.710250 ± 0.000016 (n = 16) Finnigan MAT 262.

<sup>87</sup>Sr/<sup>86</sup>Sr = 0.710245 ± 0.000014 (n = 11) Thermo Scientific Triton Plus.

Accepted value of McArthur et al.<sup>36</sup> = 0.710248

**Table S5.** Codes, details, and Sr isotopic compositions of samples employed to generate working isoscape for the Karoo Supergroup (note: a single average value taken for replicates).

| Sample code                                                    | Material | Taxon                         | Locality, Farm or River | District/ Province | Country      | $^{87}\text{Sr}/^{86}\text{Sr}^*$ | 2SE $\pm$   | %2SE $\pm$  |
|----------------------------------------------------------------|----------|-------------------------------|-------------------------|--------------------|--------------|-----------------------------------|-------------|-------------|
| <b>Drakensberg Group</b>                                       |          |                               |                         |                    |              |                                   |             |             |
| NMB6937                                                        | Enamel   | <i>Micaelamys namaquensis</i> | Mateanong               | Mokhotlong         | Lesotho      | 0.708523                          | 0.000026    | 0.0037%     |
| NMB7331                                                        | Enamel   | <i>Rhabdomys pumilio</i>      | Marakabei               | Maseru             | Lesotho      | 0.708159                          | 0.000008    | 0.0011%     |
| NMB8166                                                        | Enamel   | <i>Otomys irroratus</i>       | Bokong                  | Thaba-Tseka        | Lesotho      | 0.711607                          | 0.000009    | 0.0013%     |
| NMB8357                                                        | Enamel   | <i>Otomys irroratus</i>       | Oxbow Ski Lodge         | Butha-Buthe        | Lesotho      | 0.708785                          | 0.000008    | 0.0011%     |
| NMB8427                                                        | Enamel   | <i>Micaelamys namaquensis</i> | Moqotoane               | Thaba-Tseka        | Lesotho      | 0.707811                          | 0.00001     | 0.0014%     |
| NMB8641                                                        | Enamel   | <i>Micaelamys namaquensis</i> | Botsoela                | Mafeteng           | Lesotho      | 0.709177                          | 0.000009    | 0.0013%     |
| S7.1                                                           | Soil     | -                             | Sehonghong              | Thaba-Tseka        | Lesotho      | 0.709800                          | 0.000014    | 0.0019%     |
| S19.1                                                          | Soil     | -                             | Sehonghong              | Thaba-Tseka        | Lesotho      | 0.708752                          | 0.000014    | 0.0019%     |
| V144                                                           | Plant    | <i>Themeda triandra</i>       | Sehonghong              | Thaba-Tseka        | Lesotho      | 0.710648                          | 0.000014    | 0.0020%     |
| V145                                                           | Plant    | <i>Themeda triandra</i>       | Sehonghong              | Thaba-Tseka        | Lesotho      | 0.710105                          | 0.000015    | 0.0021%     |
| V146                                                           | Plant    | <i>Themeda triandra</i>       | Sehonghong              | Thaba-Tseka        | Lesotho      | 0.710024                          | 0.000018    | 0.0025%     |
| V148                                                           | Plant    | <i>Themeda triandra</i>       | Sehonghong              | Thaba-Tseka        | Lesotho      | 0.709536                          | 0.000016    | 0.0023%     |
| V151                                                           | Plant    | <i>Themeda triandra</i>       | Sehonghong              | Thaba-Tseka        | Lesotho      | 0.708713                          | 0.000026    | 0.0037%     |
| U4 <sup>‡</sup>                                                | Water    | -                             | Senquyane R.            | Maseru             | Lesotho      | 0.708530                          | unpublished | unpublished |
| U5 <sup>‡</sup>                                                | Water    | -                             | Orange-Senqu R.         | Thaba-Tseka        | Lesotho      | 0.708370                          | unpublished | unpublished |
| U7 <sup>‡</sup>                                                | Water    | -                             | Orange-Senqu R.         | Thaba-Tseka        | Lesotho      | 0.708240                          | unpublished | unpublished |
| U8 <sup>‡</sup>                                                | Water    | -                             | Orange-Senqu R.         | Thaba-Tseka        | Lesotho      | 0.708110                          | unpublished | unpublished |
| <b>Upper Stormberg Group (Clarens Formation)</b>               |          |                               |                         |                    |              |                                   |             |             |
| NMB6667                                                        | Enamel   | <i>Rhabdomys pumilio</i>      | Schlabathebe N.P.       | Qacha's Nek        | Lesotho      | 0.712061                          | 0.000006    | 0.0009%     |
| S15.1                                                          | Soil     | -                             | Khomo-ea-Mollo          | Thaba-Tseka        | Lesotho      | 0.710071                          | 0.000012    | 0.0017%     |
| S17.1                                                          | Soil     | -                             | Khomo-ea-Mollo          | Thaba-Tseka        | Lesotho      | 0.711644                          | 0.000009    | 0.0013%     |
| S26.1                                                          | Soil     | -                             | Khomo-ea-Mollo          | Thaba-Tseka        | Lesotho      | 0.712386                          | 0.000012    | 0.0017%     |
| S28.1                                                          | Soil     | -                             | Khomo-ea-Mollo          | Thaba-Tseka        | Lesotho      | 0.712696                          | 0.000017    | 0.0024%     |
| S31.1                                                          | Soil     | -                             | Khomo-ea-Mollo          | Thaba-Tseka        | Lesotho      | 0.713272                          | 0.000015    | 0.0021%     |
| V107                                                           | Plant    | <i>Themeda triandra</i>       | Khomo-ea-Mollo          | Thaba-Tseka        | Lesotho      | 0.712404                          | 0.000013    | 0.0018%     |
| V108                                                           | Plant    | <i>Themeda triandra</i>       | Khomo-ea-Mollo          | Thaba-Tseka        | Lesotho      | 0.713681                          | 0.000016    | 0.0022%     |
| V109                                                           | Plant    | <i>Themeda triandra</i>       | Khomo-ea-Mollo          | Thaba-Tseka        | Lesotho      | 0.713089                          | 0.000016    | 0.0022%     |
| V110                                                           | Plant    | <i>Themeda triandra</i>       | Khomo-ea-Mollo          | Thaba-Tseka        | Lesotho      | 0.712713                          | 0.000029    | 0.0041%     |
| <b>Lower Stormberg Group (Elliot &amp; Molteno Formations)</b> |          |                               |                         |                    |              |                                   |             |             |
| NMB1674                                                        | Enamel   | <i>Lepus saxatilis</i>        | Nova                    | Free State         | South Africa | 0.713822                          | 0.000008    | 0.0011%     |
| NMB1781                                                        | Enamel   | <i>Procavia capensis</i>      | Northend                | Free State         | South Africa | 0.712751                          | 0.000007    | 0.0009%     |
| NMB3448                                                        | Enamel   | <i>Lepus saxatilis</i>        | Malutizight             | Free State         | South Africa | 0.712727                          | 0.000009    | 0.0012%     |
| NMB4054                                                        | Enamel   | <i>Pedetes capensis</i>       | Alpha                   | Free State         | South Africa | 0.712316                          | 0.000008    | 0.0012%     |
| NMB4131                                                        | Enamel   | <i>Lepus saxatilis</i>        | Letsoana Stad           | Free State         | South Africa | 0.712660                          | 0.000009    | 0.0013%     |
| NMB4714                                                        | Enamel   | <i>Procavia capensis</i>      | Buffelsfontein          | E. Cape            | South Africa | 0.715998                          | 0.000006    | 0.0008%     |
| NMB4858                                                        | Enamel   | <i>Lepus saxatilis</i>        | Ben Becula              | E. Cape            | South Africa | 0.714393                          | 0.000021    | 0.0030%     |
| NMB7003                                                        | Enamel   | <i>Gerbilliscus brantsii</i>  | Maidenshope             | Free State         | South Africa | 0.715171                          | 0.00001     | 0.0014%     |
| NMB8202                                                        | Enamel   | <i>Micaelamys namaquensis</i> | Mount Moorosi           | Quthing            | Lesotho      | 0.715352                          | 0.000011    | 0.0016%     |
| NMB9196                                                        | Enamel   | <i>Lepus saxatilis</i>        | Qwa-Qwa N.P.            | Free State         | South Africa | 0.714299                          | 0.000013    | 0.0018%     |
| OV25 <sup>‡</sup>                                              | Water    | -                             | Caledon R.              | Free State         | South Africa | 0.712650                          | unpublished | unpublished |
| <b>Beaufort Group</b>                                          |          |                               |                         |                    |              |                                   |             |             |
| MMK3432                                                        | Enamel   | <i>Pedetes capensis</i>       | Doornkloof              | N. Cape            | South Africa | 0.713774                          | 0.000017    | 0.0024%     |
| NMB2608                                                        | Enamel   | <i>Pedetes capensis</i>       | De Berg                 | Free State         | South Africa | 0.711978                          | 0.000008    | 0.0011%     |
| NMB2886                                                        | Enamel   | <i>Pedetes capensis</i>       | Kommertjiesfontein      | Free State         | South Africa | 0.713259                          | 0.000009    | 0.0013%     |
| NMB3107                                                        | Enamel   | <i>Lepus saxatilis</i>        | Mooihoek                | Free State         | South Africa | 0.714221                          | 0.000007    | 0.0010%     |
| NMB3126                                                        | Enamel   | <i>Lepus saxatilis</i>        | Asem                    | Free State         | South Africa | 0.714943                          | 0.000012    | 0.0017%     |
| NMB3263                                                        | Enamel   | <i>Xerus inauris</i>          | Graspan                 | Free State         | South Africa | 0.714677                          | 0.000011    | 0.0015%     |
| NMB3273                                                        | Enamel   | <i>Pedetes capensis</i>       | Eureka                  | Free State         | South Africa | 0.713577                          | 0.000006    | 0.0008%     |
| NMB3518                                                        | Enamel   | <i>Procavia capensis</i>      | Toledo                  | Free State         | South Africa | 0.716231                          | 0.000009    | 0.0013%     |
| NMB3705                                                        | Enamel   | <i>Lepus saxatilis</i>        | Allemansdrift           | Free State         | South Africa | 0.712315                          | 0.000011    | 0.0015%     |
| NMB3739                                                        | Enamel   | <i>Xerus inauris</i>          | Eendrag                 | Free State         | South Africa | 0.713935                          | 0.000007    | 0.0009%     |
| NMB4333                                                        | Enamel   | <i>Procavia capensis</i>      | Brandlaagte             | E. Cape            | South Africa | 0.715093                          | 0.000007    | 0.0010%     |
| OV27 <sup>‡</sup>                                              | Water    | -                             | Orange-Senqu R.         | Free State         | South Africa | 0.712300                          | unpublished | unpublished |
| OV27 (rep.) <sup>‡</sup>                                       | Water    | -                             | Orange-Senqu R.         | Free State         | South Africa | 0.712160                          | unpublished | unpublished |
| <b>Ecce/Dwyka Group</b>                                        |          |                               |                         |                    |              |                                   |             |             |
| MMK3158                                                        | Enamel   | <i>Pronolagus rupestris</i>   | Preezfontein            | Free State         | South Africa | 0.712595                          | 0.000012    | 0.0017%     |
| MMK3411                                                        | Enamel   | <i>Pedetes capensis</i>       | Waterford               | N. Cape            | South Africa | 0.716794                          | 0.000016    | 0.0023%     |
| MMK3164                                                        | Enamel   | <i>Pronolagus rupestris</i>   | Vogelfontein            | N. Cape            | South Africa | 0.715665                          | 0.000016    | 0.0022%     |
| MMK322                                                         | Enamel   | <i>Cryptomys hottentotus</i>  | Benfontein              | Free State         | South Africa | 0.715128                          | 0.000013    | 0.0018%     |
| MMK3466                                                        | Enamel   | <i>Xerus inauris</i>          | Uitkrans                | N. Cape            | South Africa | 0.717322                          | 0.000016    | 0.0022%     |
| MMK3459                                                        | Enamel   | <i>Xerus inauris</i>          | Rodeseput               | N. Cape            | South Africa | 0.715762                          | 0.000018    | 0.0025%     |
| MMK3551                                                        | Enamel   | <i>Otomys unisulcatus</i>     | Onder-Downes            | N. Cape            | South Africa | 0.713224                          | 0.000018    | 0.0025%     |
| NMB1434                                                        | Enamel   | <i>Lepus saxatilis</i>        | La Riviera              | Free State         | South Africa | 0.713940                          | 0.000008    | 0.0011%     |
| NMB1576                                                        | Enamel   | <i>Xerus inauris</i>          | Nielsview               | Free State         | South Africa | 0.716169                          | 0.000009    | 0.0012%     |
| NMB3862                                                        | Enamel   | <i>Lepus saxatilis</i>        | Alma (Glen Alphen)      | Free State         | South Africa | 0.715514                          | 0.000007    | 0.0009%     |
| OV30 <sup>‡</sup>                                              | Water    | -                             | Orange-Senqu R.         | N. Cape            | South Africa | 0.712860                          | unpublished | unpublished |
| OV30 (rep.) <sup>‡</sup>                                       | Water    | -                             | Orange-Senqu R.         | N. Cape            | South Africa | 0.712540                          | unpublished | unpublished |

\* Mean value for the Sr standard NBS 987:

$^{87}\text{Sr}/^{86}\text{Sr} = 0.710250 \pm 0.000016$  (n = 16) Finnigan MAT 262.

$^{87}\text{Sr}/^{86}\text{Sr} = 0.710245 \pm 0.000014$  (n = 11) Thermo Scientific Triton Plus.

Accepted value of McArthur et al.<sup>36</sup> = 0.710248

‡ Values from de Villiers et al.<sup>37</sup>

**Table S6.** Ostrich eggshell bead Ca and Sr concentrations by ICP-OES.

| Sample code | Site       | Layer     | Age (kcal BP) | Stage            | Sr (ug/g)  | Ca (ug/g)  | Ca/Sr (wt.) | Ca (wt.%)  |
|-------------|------------|-----------|---------------|------------------|------------|------------|-------------|------------|
| SF-4        | Melikane   | 1         | 0.3–0.15      | Late Holocene    | 35.6       | 200000     | 5610.2      | 20         |
| SF-10       | Melikane   | 2         | 3.3–0.15      | Late Holocene    | 120.5      | 200000     | 1659.6      | 20         |
| SF-13       | Melikane   | 2         | 3.3–0.15      | Late Holocene    | 81.2       | 200000     | 2461.7      | 20         |
| SF-20       | Melikane   | 2         | 3.3–0.15      | Late Holocene    | 108.9      | 200000     | 1836.6      | 20         |
| SF-29       | Melikane   | 2         | 3.3–0.15      | Late Holocene    | 116.3      | 200000     | 1719.4      | 20         |
| SF-43       | Melikane   | 2         | 3.3–0.15      | Late Holocene    | 151.9      | 200000     | 1316.9      | 20         |
| SF-48       | Melikane   | 2         | 3.3–0.15      | Late Holocene    | 73.6       | 200000     | 2719.1      | 20         |
| SF-56       | Melikane   | 2         | 3.3–0.15      | Late Holocene    | 148.9      | 200000     | 1342.9      | 20         |
| SF-70       | Melikane   | 2         | 3.3–0.15      | Late Holocene    | 78.6       | 200000     | 2543.1      | 20         |
| SF-87       | Melikane   | 2         | 3.3–0.15      | Late Holocene    | 47.4       | 200000     | 4217.7      | 20         |
| SF-90       | Melikane   | 2         | 3.3–0.15      | Late Holocene    | 125.5      | 200000     | 1594.3      | 20         |
| SF-86       | Sehonghong | DC        | 1.26–0.98     | Late Holocene    | 116.8      | 190645     | 1632.6      | 19.06      |
| SF-101      | Sehonghong | DC        | 1.26–0.98     | Late Holocene    | 158.5      | 193538     | 1221.1      | 19.35      |
| J12-11B     | Sehonghong | DC        | 1.26–0.98     | Late Holocene    | 132        | 194545     | 1473.3      | 19.45      |
| J12-11C     | Sehonghong | DC        | 1.26–0.98     | Late Holocene    | 160.3      | 205795     | 1283.8      | 20.58      |
| SF-691      | Sehonghong | DC        | 1.26–0.98     | Late Holocene    | 51.2       | 194569     | 2339.1      | 19.46      |
| SF-174      | Sehonghong | ALP       | 8.3–7.67      | Early Holocene   | 177.1      | 196739     | 1110.8      | 19.67      |
| SF-231      | Sehonghong | ALP       | 8.3–7.67      | Early Holocene   | 91.5       | 199125     | 2176.2      | 19.91      |
| SF-265      | Sehonghong | ALP       | 8.3–7.67      | Early Holocene   | 87.8       | 191000     | 2175.9      | 19.1       |
| SF-267      | Sehonghong | ALP       | 8.3–7.67      | Early Holocene   | 56.2       | 205776     | 3658.8      | 20.58      |
| SF-751      | Sehonghong | ALP       | 8.3–7.67      | Early Holocene   | 85.9       | 201016     | 3799.7      | 20.1       |
| SF-430      | Sehonghong | BARF      | 13.4–12.6     | Late Pleistocene | 83.3       | 194728     | 2337.2      | 19.47      |
| SF-1090     | Sehonghong | RF        | 15–13.7       | Late Pleistocene | 67.1       | 202838     | 3024.4      | 20.28      |
| SF-1091     | Sehonghong | RF        | 15–13.7       | Late Pleistocene | 79.2       | 212600     | 2683.7      | 21.26      |
| SF-1092     | Sehonghong | RF        | 15–13.7       | Late Pleistocene | 139.4      | 193963     | 1391.5      | 19.4       |
| SF-392      | Sehonghong | RBL-CRBLF | 15.7–15.2     | Late Pleistocene | 85.9       | 155924     | 1814.7      | 15.59      |
| I13-170     | Sehonghong | n/a       | 33.7–31.9     | Late Pleistocene | Unobtained | Unobtained | Unobtained  | Unobtained |

**Table S7.** Soil, plant and small mammal tooth enamel Ca and Sr concentrations by ICP-OES.

| Sample code                         | Taxon                         | Locality/Farm      | Province/District | Country      | Lithology* | Sr (ug/g)  | Ca (ug/g)  | Ca/Sr (wt.) | Ca (wt. %) |
|-------------------------------------|-------------------------------|--------------------|-------------------|--------------|------------|------------|------------|-------------|------------|
| <b>Soils</b>                        |                               |                    |                   |              |            |            |            |             |            |
| S1.1 (HNO3)                         | -                             | Sehonghong         | Thaba-Tseka       | Lesotho      | Dr, Cl     | 8.4        | 3186       | 377.5       | 0.32       |
| S1.1 (NH4Cl)                        | -                             | Sehonghong         | Thaba-Tseka       | Lesotho      | Dr, Cl     | 9.5        | 4434       | 465         | 0.44       |
| S7.1 (HNO3)                         | -                             | Sehonghong         | Thaba-Tseka       | Lesotho      | Dr         | 3.6        | 1394.8     | 387         | 0.14       |
| S7.1 (NH4Cl)                        | -                             | Sehonghong         | Thaba-Tseka       | Lesotho      | Dr         | 9.7        | 2726       | 280.5       | 0.27       |
| S14.1 (HNO3)                        | -                             | Sehonghong         | Thaba-Tseka       | Lesotho      | Dr, Cl     | 10         | 4252       | 425         | 0.43       |
| S14.1 (NH4Cl)                       | -                             | Sehonghong         | Thaba-Tseka       | Lesotho      | Dr, Cl     | 10.1       | 4136       | 409.7       | 0.41       |
| S15.1 (HNO3)                        | -                             | Khomo-ea-Mollo     | Thaba-Tseka       | Lesotho      | Cl         | Unobtained | Unobtained | Unobtained  | Unobtained |
| S15.1 (NH4Cl)                       | -                             | Khomo-ea-Mollo     | Thaba-Tseka       | Lesotho      | Cl         | Unobtained | Unobtained | Unobtained  | Unobtained |
| S17.1 (HNO3)                        | -                             | Khomo-ea-Mollo     | Thaba-Tseka       | Lesotho      | Cl         | 7.6        | 3112       | 407.1       | 0.31       |
| S17.1 (NH4Cl)                       | -                             | Khomo-ea-Mollo     | Thaba-Tseka       | Lesotho      | Cl         | 9.3        | 3038       | 327.3       | 0.3        |
| S19.1 (HNO3)                        | -                             | Sehonghong         | Thaba-Tseka       | Lesotho      | Dr         | 9.7        | 3544       | 364.8       | 0.35       |
| S19.1 (NH4Cl)                       | -                             | Sehonghong         | Thaba-Tseka       | Lesotho      | Dr         | 11.4       | 2874       | 253         | 0.29       |
| S26.1 (HNO3)                        | -                             | Khomo-ea-Mollo     | Thaba-Tseka       | Lesotho      | Cl         | 13         | 4656       | 357.8       | 0.47       |
| S26.1 (NH4Cl)                       | -                             | Khomo-ea-Mollo     | Thaba-Tseka       | Lesotho      | Cl         | 7.9        | 3182       | 404.8       | 0.32       |
| S28.1 (HNO3)                        | -                             | Khomo-ea-Mollo     | Thaba-Tseka       | Lesotho      | Cl         | Unobtained | Unobtained | Unobtained  | Unobtained |
| S28.1 (NH4Cl)                       | -                             | Khomo-ea-Mollo     | Thaba-Tseka       | Lesotho      | Cl         | Unobtained | Unobtained | Unobtained  | Unobtained |
| S31.1 (HNO3)                        | -                             | Khomo-ea-Mollo     | Thaba-Tseka       | Lesotho      | Cl         | 3.9        | 1188.2     | 301.6       | 0.12       |
| S31.1 (NH4Cl)                       | -                             | Khomo-ea-Mollo     | Thaba-Tseka       | Lesotho      | Cl         | 9.4        | 2760       | 293.5       | 0.28       |
| <b>Plants</b>                       |                               |                    |                   |              |            |            |            |             |            |
| V107                                | <i>Themeda triandra</i>       | Khomo-ea-Mollo     | Thaba-Tseka       | Lesotho      | Cl         | 20.9       | 8764.9     | 419.6       | 0.88       |
| V108                                | <i>Themeda triandra</i>       | Khomo-ea-Mollo     | Thaba-Tseka       | Lesotho      | Cl         | 150.4      | 48481.3    | 322.3       | 4.85       |
| V109                                | <i>Themeda triandra</i>       | Khomo-ea-Mollo     | Thaba-Tseka       | Lesotho      | Cl         | 17.3       | 2925.9     | 168.8       | 0.29       |
| V110                                | <i>Themeda triandra</i>       | Khomo-ea-Mollo     | Thaba-Tseka       | Lesotho      | Cl         | 30.8       | 12422.3    | 403.9       | 1.24       |
| V144                                | <i>Themeda triandra</i>       | Sehonghong         | Thaba-Tseka       | Lesotho      | Dr         | 11.3       | 3626.7     | 322.1       | 0.36       |
| V145                                | <i>Themeda triandra</i>       | Sehonghong         | Thaba-Tseka       | Lesotho      | Dr         | Unobtained | Unobtained | Unobtained  | Unobtained |
| V146                                | <i>Themeda triandra</i>       | Sehonghong         | Thaba-Tseka       | Lesotho      | Dr         | 27.1       | 11802.7    | 435.5       | 1.18       |
| V148                                | <i>Themeda triandra</i>       | Sehonghong         | Thaba-Tseka       | Lesotho      | Dr         | 11.2       | 5469.6     | 489.8       | 0.55       |
| V151                                | <i>Themeda triandra</i>       | Sehonghong         | Thaba-Tseka       | Lesotho      | Dr         | 9.6        | 2344       | 245         | 0.23       |
| <b>Small mammals (tooth enamel)</b> |                               |                    |                   |              |            |            |            |             |            |
| MMK322                              | <i>Cryptomys hottentotus</i>  | Benfontein         | Free State        | South Africa | E/D        | 343.3      | 225600     | 657.2       | 22.56      |
| MMK3158                             | <i>Pronolagus rupestris</i>   | Preezfontein       | Free State        | South Africa | E/D        | 480.4      | 240480     | 500.6       | 24.05      |
| MMK3164                             | <i>Pronolagus rupestris</i>   | Vogelfontein       | N. Cape           | South Africa | E/D        | 208.3      | 212240     | 1018.8      | 21.22      |
| MMK3411                             | <i>Pedetes capensis</i>       | Waterford          | N. Cape           | South Africa | E/D        | 232.6      | 315200     | 1355.3      | 31.52      |
| MMK3432                             | <i>Pedetes capensis</i>       | Doornkloof         | N. Cape           | South Africa | B          | 112.5      | 300240     | 2669.3      | 30.02      |
| MMK3466                             | <i>Xerus inauris</i>          | Uitkrans           | N. Cape           | South Africa | E/D        | 370.5      | 245440     | 662.5       | 24.54      |
| MMK3459                             | <i>Xerus inauris</i>          | Rodeseput          | N. Cape           | South Africa | E/D        | 249        | 250480     | 1006.1      | 25.05      |
| MMK3551                             | <i>Otomys unisulcatus</i>     | Onder-Downes       | N. Cape           | South Africa | E/D        | 353.8      | 276800     | 782.3       | 27.68      |
| NMB1434                             | <i>Lepus saxatilis</i>        | La Riviera         | Free State        | South Africa | E/D        | 110.4      | 172206     | 1559.3      | 17.22      |
| NMB1576                             | <i>Xerus inauris</i>          | Nielsview          | Free State        | South Africa | E/D        | 211.8      | 206170     | 973.4       | 20.62      |
| NMB1674                             | <i>Lepus saxatilis</i>        | Nova               | Free State        | South Africa | LS         | 309.3      | 290909     | 940.5       | 29.09      |
| NMB1781                             | <i>Procavia capensis</i>      | Northend           | Free State        | South Africa | LS         | Unobtained | Unobtained | Unobtained  | Unobtained |
| NMB2608                             | <i>Pedetes capensis</i>       | De Berg            | Free State        | South Africa | B          | 303.9      | 378468     | 1245.5      | 37.85      |
| NMB2886                             | <i>Pedetes capensis</i>       | Kommetjiesfontein  | Free State        | South Africa | B          | 64.2       | 190657     | 2969.7      | 19.07      |
| NMB3107                             | <i>Lepus saxatilis</i>        | Mooihoek           | Free State        | South Africa | B          | 179.6      | 327872     | 1825.8      | 32.79      |
| NMB3126                             | <i>Lepus saxatilis</i>        | Asem               | Free State        | South Africa | B          | 275.2      | 278089     | 1010.7      | 27.81      |
| NMB3263                             | <i>Xerus inauris</i>          | Graspan            | Free State        | South Africa | B          | 76.1       | 207600     | 2728.5      | 20.76      |
| NMB3273                             | <i>Pedetes capensis</i>       | Eureka             | Free State        | South Africa | B          | 314.5      | 327130     | 1040        | 32.71      |
| NMB3448                             | <i>Lepus saxatilis</i>        | Malutizight        | Free State        | South Africa | LS         | 219.8      | 301373     | 1371.1      | 30.14      |
| NMB3518                             | <i>Procavia capensis</i>      | Toledo             | Free State        | South Africa | B          | Unobtained | Unobtained | Unobtained  | Unobtained |
| NMB3705                             | <i>Lepus saxatilis</i>        | Allemansdrift      | Free State        | South Africa | B          | 158.2      | 258229     | 1632        | 25.82      |
| NMB3739                             | <i>Xerus inauris</i>          | Eendrag            | Free State        | South Africa | B          | 133.5      | 286563     | 2146.3      | 28.66      |
| NMB3862                             | <i>Lepus saxatilis</i>        | Alma (Glen Alphen) | Free State        | South Africa | E/D        | 236        | 277212     | 1174.8      | 27.72      |
| NMB4054                             | <i>Pedetes capensis</i>       | Alpha              | Free State        | South Africa | LS         | 210.7      | 298696     | 1417.7      | 29.87      |
| NMB4131                             | <i>Lepus saxatilis</i>        | Letsoana Stad      | Free State        | South Africa | LS         | 129.7      | 244328     | 1883.3      | 24.43      |
| NMB4333                             | <i>Procavia capensis</i>      | Brandlaagte        | E. Cape           | South Africa | LS         | Unobtained | Unobtained | Unobtained  | Unobtained |
| NMB4714                             | <i>Procavia capensis</i>      | Buffelsfontein     | E. Cape           | South Africa | LS         | Unobtained | Unobtained | Unobtained  | Unobtained |
| NMB4858                             | <i>Lepus saxatilis</i>        | Ben Becula         | E. Cape           | South Africa | LS         | 203.7      | 297763     | 1461.9      | 29.78      |
| NMB6667                             | <i>Rhabdomys pumilio</i>      | Sehlabathebe N.P.  | Qacha's Nek       | Lesotho      | Cl         | 557.2      | 413667     | 742.4       | 41.37      |
| NMB6937                             | <i>Micaelamys namaquensis</i> | Mateanong          | Mokhotlong        | Lesotho      | Dr         | 86.4       | 278629     | 3226        | 27.86      |
| NMB7003                             | <i>Gerbilliscus brantsii</i>  | Maidenshope        | Free State        | South Africa | LS         | 182.8      | 200727     | 1098.3      | 20.07      |
| NMB7331                             | <i>Rhabdomys pumilio</i>      | Marakabei          | Maseru            | Lesotho      | Dr         | 104.8      | 345686     | 3298.4      | 34.57      |
| NMB8166                             | <i>Otomys irroratus</i>       | Bokong             | Thaba-Tseka       | Lesotho      | Dr         | 104.8      | 165000     | 1574.7      | 16.5       |
| NMB8202                             | <i>Micaelamys namaquensis</i> | Mount Moorosi      | Quthing           | Lesotho      | Cl         | 223.9      | 327963     | 1464.8      | 32.8       |
| NMB8357                             | <i>Otomys irroratus</i>       | Oxbow Ski Lodge    | Butha-Buthe       | Lesotho      | Dr         | 147.1      | 241642     | 1642.8      | 24.16      |
| NMB8427                             | <i>Micaelamys namaquensis</i> | Moqotoane          | Thaba-Tseka       | Lesotho      | Dr         | 94.4       | 278148     | 2945.1      | 27.81      |
| NMB8641                             | <i>Micaelamys namaquensis</i> | Botsoela           | Mafeteng          | Lesotho      | Dr         | 128.4      | 415614     | 3236.3      | 41.56      |
| NMB9196                             | <i>Lepus saxatilis</i>        | Qwa-Qwa N.P.       | Free State        | South Africa | LS         | 126.4      | 185684     | 1468.5      | 18.57      |

\* Lithology codes: Dr: Drakensberg Group; Cl: Clarens Formation; LS: Lower Stormberg Group; B: Beaufort Group; E/D: Ecca/Dwyka Group.

**Figure S7.** Map of (a) small mammal tooth enamel and water and (b) plant and soil sample locations for generating both the highland baseline and the Karoo Supergroup working isoscape.

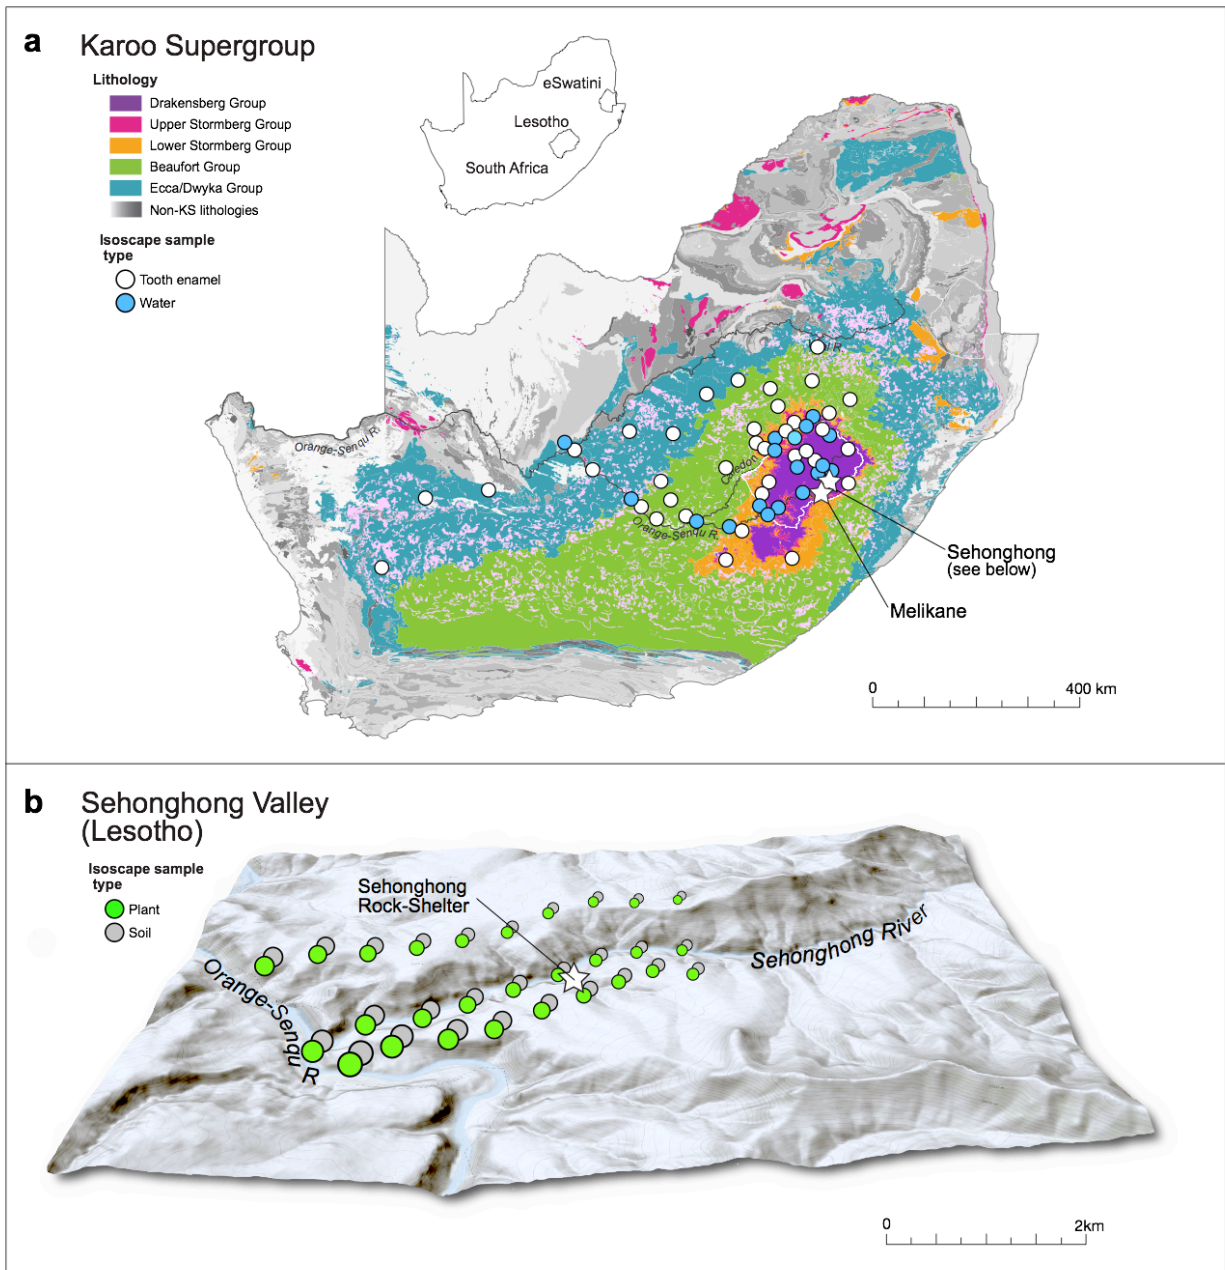

**Table S8.** Spatial coordinates of samples used to generate the Karoo Supergroup working isoscape.

| Sample code       | 87Sr/86Sr | Y         | X        | Material | Comment            |
|-------------------|-----------|-----------|----------|----------|--------------------|
| MMK3158           | 0.71260   | -29.80000 | 25.38333 | Enamel   |                    |
| MMK3411           | 0.71679   | -29.60000 | 24.08333 | Enamel   |                    |
| MMK3432           | 0.71377   | -30.33333 | 25.03333 | Enamel   |                    |
| MMK3164           | 0.71567   | -28.90000 | 23.65000 | Enamel   |                    |
| MMK322            | 0.71513   | -28.83333 | 24.81667 | Enamel   |                    |
| MMK3466           | 0.71732   | -29.95000 | 22.05000 | Enamel   |                    |
| MMK3459           | 0.71576   | -30.16667 | 20.80000 | Enamel   |                    |
| MMK3551           | 0.71322   | -31.51667 | 19.93333 | Enamel   |                    |
| NMB1434           | 0.71394   | -28.07439 | 26.32528 | Enamel   |                    |
| NMB1576           | 0.71617   | -28.87067 | 25.68567 | Enamel   |                    |
| NMB1674           | 0.71382   | -29.03883 | 27.37003 | Enamel   |                    |
| NMB1781           | 0.71275   | -28.85009 | 27.91170 | Enamel   |                    |
| NMB2608           | 0.71198   | -29.57032 | 26.72394 | Enamel   |                    |
| NMB2886           | 0.71326   | -30.19894 | 25.63301 | Enamel   |                    |
| NMB3107           | 0.71422   | -28.20245 | 29.15450 | Enamel   |                    |
| NMB3126           | 0.71494   | -28.33139 | 27.75125 | Enamel   |                    |
| NMB3263           | 0.71468   | -27.81233 | 26.96788 | Enamel   |                    |
| NMB3273           | 0.71358   | -27.98065 | 27.58900 | Enamel   |                    |
| NMB3448           | 0.71273   | -28.73803 | 28.06398 | Enamel   |                    |
| NMB3518           | 0.71623   | -27.83078 | 28.41297 | Enamel   |                    |
| NMB3705           | 0.71232   | -30.54572 | 25.35370 | Enamel   |                    |
| NMB3739           | 0.71394   | -30.52267 | 25.91769 | Enamel   |                    |
| NMB3862           | 0.71551   | -27.12437 | 28.52160 | Enamel   |                    |
| NMB4054           | 0.71232   | -29.11233 | 27.64440 | Enamel   |                    |
| NMB4131           | 0.71266   | -28.57220 | 28.42074 | Enamel   |                    |
| NMB4333           | 0.71509   | -30.80944 | 27.04312 | Enamel   |                    |
| NMB4714           | 0.71600   | -31.36518 | 26.71571 | Enamel   |                    |
| NMB4858           | 0.71439   | -31.34242 | 28.02520 | Enamel   |                    |
| NMB6667           | 0.71206   | -29.86902 | 29.11613 | Enamel   |                    |
| NMB6937           | 0.70852   | -29.20000 | 29.13000 | Enamel   |                    |
| NMB7003           | 0.71517   | -28.78391 | 27.29614 | Enamel   |                    |
| NMB7331           | 0.70816   | -29.32000 | 28.08000 | Enamel   |                    |
| NMB8166           | 0.71161   | -29.22000 | 28.32000 | Enamel   |                    |
| NMB8202           | 0.71535   | -30.14000 | 27.53000 | Enamel   |                    |
| NMB8357           | 0.70879   | -28.47000 | 28.41000 | Enamel   |                    |
| NMB8427           | 0.70781   | -29.42000 | 28.48000 | Enamel   |                    |
| NMB8641           | 0.70918   | -29.84858 | 27.55989 | Enamel   |                    |
| NMB9196           | 0.71430   | -28.46383 | 28.70372 | Enamel   |                    |
| U8 <sup>‡</sup>   | 0.70811   | -29.60000 | 28.63000 | Water    |                    |
| U7 <sup>‡</sup>   | 0.70824   | -29.53000 | 28.583   | Water    |                    |
| U5 <sup>‡</sup>   | 0.70837   | -29.60000 | 28.6833  | Water    |                    |
| U4 <sup>‡</sup>   | 0.70853   | -29.56660 | 28.1333  | Water    |                    |
| OV16 <sup>‡</sup> | 0.71196   | -30.31666 | 27.4     | Water    | Mean of OV16 1 & 2 |
| OV17 <sup>‡</sup> | 0.70872   | -30.03330 | 28.23333 | Water    |                    |
| OV18 <sup>‡</sup> | 0.70904   | -30.36667 | 27.73333 | Water    |                    |
| OV19 <sup>‡</sup> | 0.71229   | -30.45000 | 27.56666 | Water    |                    |
| OV9 <sup>‡</sup>  | 0.70903   | -28.63333 | 28.41666 | Water    |                    |
| OV10 <sup>‡</sup> | 0.70910   | -28.70000 | 28.36666 | Water    |                    |
| OV12 <sup>‡</sup> | 0.71070   | -28.90000 | 28.03333 | Water    |                    |
| OV14 <sup>‡</sup> | 0.71171   | -29.08333 | 27.66666 | Water    |                    |
| OV15 <sup>‡</sup> | 0.71141   | -29.11666 | 27.65    | Water    |                    |
| OV11 <sup>‡</sup> | 0.70887   | -28.76667 | 28.65    | Water    |                    |
| OV20 <sup>‡</sup> | 0.71067   | -30.73333 | 26.78333 | Water    | Mean of OV20 1 & 2 |

‡ Values from de Villiers et al.<sup>37</sup>

### 3. Further details on materials and methods

#### *3.1 Sample preparation*

Interior portions of ostrich eggshell beads were drilled using a sterilized dental micro-drill device to extract sufficient and unaltered material for Sr isotopic analysis. This was precisely weighed and approximately 5 mg of powdered bead material was transferred into an acid-washed 15 ml teflon beaker. All sample digestions were carried out in a HEPA-filtered fume hood in acid-washed labware. Acids were double-distilled Seastar-grade and water was deionized. Up to 2 ml of HNO<sub>3</sub> was used to digest the bead powders. Once the reaction was complete, 100 microliters of H<sub>2</sub>O<sub>2</sub> was added by pipette and the sample beaker was capped tightly. Samples were heated overnight at 100° C, followed by evaporation to dryness at 80°C. Following additional treatment with HNO<sub>3</sub> the sample was dried at 100°C, taken up in 1ml HNO<sub>3</sub> and diluted to 5 ml with H<sub>2</sub>O for a final acid concentration of 20% HNO<sub>3</sub>. This solution was transferred to a low-density polyethylene (LDP) bottle prior to analysis.

Plant samples were freeze-dried and crushed using an acid-cleaned agate mortar and pestle, prior to high pressure microwave acid digestion. Approximately 500 mg of finely ground material was weighed into acid-cleaned microwave vessels and digested using high-pressure hydrothermal microwave acid digestion (CEM MARS 5) in a concentrated HNO<sub>3</sub>-HCl acid mixture at 240°C and 350psi. The digest solution was further treated in several steps in Savillex Teflon beakers. Several HNO<sub>3</sub>-H<sub>2</sub>O<sub>2</sub> additions followed by evaporation were employed until all residues and organics were gone. Clear acid solutions were then diluted to 5% HNO<sub>3</sub> and transferred (10 ml total) into 15ml LDP bottles.

Soil samples were freeze-dried and crushed using an acid-cleaned agate mortar and pestle, prior to sequential extraction steps for isolating (1) loosely bound soil cations (plant-available pool), and (2) the non-silicate mineral nutrient pool (mainly carbonate and phosphate) in the soils. Approximately 500 mg of finely ground soil material was weighed and transferred into polycarbonate 15 ml centrifuge tubes, then subjected to the 2-step sequential extraction procedure as follows:

- 1) Overnight agitation on a shaker table at room temperature in 5ml of pH neutral 1M ammonium chloride (NH<sub>4</sub>Cl), followed by centrifugation, transfer of the leachate to a 15ml LDP bottle, rinsing of the residue with 5 ml H<sub>2</sub>O, followed by centrifugation and transfer of the rinse solution for a combined NH<sub>4</sub>Cl leach solution total of 10 ml.
- 2) Overnight agitation of residue on a shaker table at room temperature with 5ml of 1M HNO<sub>3</sub> for extraction of the non-silicate mineral cation fraction, resulting (using same procedure as above) in a combined solution total of 10 ml.

Prior to analysis, these 10 ml soil leach solutions were filtered at 0.45 microns, and an aliquot was extracted for further treatment in several steps using HNO<sub>3</sub> and H<sub>2</sub>O<sub>2</sub> in Teflon beakers (as above).

Individual small mammal teeth were pre-cleaned following the reductive-oxidative cleaning protocols detailed in Gleason et al.<sup>38</sup> to decontaminate surfaces of all soil or otherwise adhering contaminant Sr, slightly modified for this study. Briefly, each individual small mammal tooth was weighed and then subjected to a multi-step oxidative-reductive cleaning procedure involving several reagents plus heat and ultra-sonification in the following order:



- 1) Sodium citrate, sodium bicarbonate and sodium dithionite (CBD) reductive cleaning;
- 2) Sodium hydroxide (NaOH) treatment to remove any opaline contaminants;
- 3) Hydrogen peroxide oxidative cleaning to destroy any remaining organics;
- 4) Glacial acetic acid to assist with removal of carbonate.

Following the oxidative-reductive cleaning procedure, mammal teeth were individually weighed (~0.05 grams each) and rinsed in 0.05N HNO<sub>3</sub> followed by multiple rinses in H<sub>2</sub>O, then digested in 2ml of HNO<sub>3</sub>. Following centrifugation, 1ml of supernatant was removed and transferred to a 15 ml teflon beaker for further hotplate pre-treatment with hydrogen peroxide to break down remaining organics following the same procedures applied to the soil and vegetation samples (as detailed above). This aliquot was diluted to a volume of 5 ml 20% HNO<sub>3</sub> (as above) and transferred to a LDP bottle prior to analysis.

### *3.2 Sr Isotopic Analysis by Thermal Ionization Mass Spectrometry (TIMS)*

Prior to Sr isotopic analysis, a proportion of each digest solution equivalent to ~100 ng of Sr was transferred into a clean 15 ml teflon beaker and dried down in a HEPA-filtered fume hood. The residue was then taken up in 1ml of 3N Seastar HNO<sub>3</sub>, capped and set aside for Sr ion exchange column chemistry. Samples were loaded in 3N Seastar HNO<sub>3</sub> onto miniaturized Sr-spec resin (Eichrom) chromatographic columns for separation of Sr from matrix<sup>38,39</sup>. High-precision Sr isotope ratios were determined at the University of Michigan on a Finnigan MAT 262 solid source thermal ionization mass spectrometer (TIMS) equipped with 8 Faraday detectors, or a Triton Plus (Thermo Scientific) TIMS instrument equipped with 8 Faraday collectors employed in static mode configuration. Sr was loaded either on tungsten (W) filaments using 1N HCl with phosphoric acid binder and tantalum oxide activator, or on rhenium (Re) filaments in 7N HNO<sub>3</sub> with tantalum fluoride activator, dried down and loaded on a sample turret with the NBS 987 Sr isotope standard<sup>39</sup>. All data were collected in static mode using a ~2.0V <sup>88</sup>Sr beam, with average analytical precision of ±0.0019% (2SE) on the <sup>87</sup>Sr/<sup>86</sup>Sr ratio (n = 150 ratios on the Finnigan MAT 262; n = 400 ratios on the Triton Plus). <sup>85</sup>Rb was monitored to correct for <sup>87</sup>Rb mass interference (< 0.1 mV) on <sup>87</sup>Sr. <sup>87</sup>Sr/<sup>86</sup>Sr ratios were normalized to <sup>86</sup>Sr/<sup>88</sup>Sr = 0.1194 to correct for instrumental mass bias using (online) exponential law algorithms, and standard online statistical corrections for collector gain efficiencies and isotope ratio outlier analysis employed. The mean value for the Sr standard NBS 987 over the course of this study was <sup>87</sup>Sr/<sup>86</sup>Sr = 0.710250 ± 0.000016 (n = 16) for the Finnigan MAT 262, and <sup>87</sup>Sr/<sup>86</sup>Sr = 0.710245 ± 0.000014 (n = 11) for the Triton Plus. The accepted value from McArthur et al.<sup>36</sup> is 0.710248; therefore, no corrections were required to adjust <sup>87</sup>Sr/<sup>86</sup>Sr ratios. Total process Sr blanks were ~ 50 pg, equivalent to < 1/1000 of the sample processed, requiring no blank corrections to the data.

### *3.3. Inductively Coupled Plasma Optical Emission Spectrometry (ICP-OES) Analysis*

ICP-OES cation elemental analysis was conducted at the University of Michigan on a Perkin-Elmer Optima 3300DV ICP-OES. All sample solutions and calibration standards were run using 2% Trace Metal grade HNO<sub>3</sub>. Ca and Sr abundances, and Ca/Sr elemental ratios, are accurate in most cases to better than ± 5% based on repeat analysis of replicates, reference materials (TMDW run at different concentrations), bracketing (calibration check) standards, and system blanks for quantifying limits of detection.

#### 4. Statistical methods and results

All statistical analyses were conducted using RStudio software<sup>40</sup>. An alpha level of 0.05 was employed as the significance threshold.

The relevant  $^{87}\text{Sr}/^{86}\text{Sr}$  values were distributed into the following groups:

- 'bead' (combined sample of ostrich eggshell beads from Melikane and Sehonghong)
- 'highland' (multi-proxy highland baseline);
- 'draken' (Drakensberg Group)
- 'upstorm' (Upper Stormberg Group)
- 'lowstorm' (Lower Stormberg Group)
- 'beaufort' (Beaufort Group)
- 'eccadwyka' (Ecca/Dwyka Groups)

Prior to conducting the *t*-tests, Shapiro-Wilk tests and F-tests were employed to assess assumptions of distribution normality and sample variance equality, respectively. One extreme outlier (0.75554) in the 'bead' group was excluded from these analyses (as well as from the subsequent *t*-tests). Results of the Shapiro-Wilk tests show that all groups are normally distributed except 'highland'. This group, however, has a large enough sample size ( $n = 40$ ) that we can safely assume the data structure is close to normal. Results of the F-tests, run between the 'bead' group and each of the other groups, show that variance is statistically equal in all cases except between 'bead' and 'draken'. With all assumptions verified, we employed Welch's *t*-tests between the 'beads' group and all others due to differences in variance ('bead' vs. 'draken') and sample sizes ('bead' vs. each of the other groups). Below is the R code that we inputted into RStudio and the outputs containing all exact values.

#### **R code**

```
srplot=read.csv(file.choose(), header=TRUE)
attach(srplot)
srplot
bead=subset(Sr,sample=='bead')
highland=subset(Sr,sample=='highland')
draken=subset(Sr,sample=='draken')
upstorm=subset(Sr,sample=='upstorm')
lowstorm=subset(Sr,sample=='lowstorm')
beaufort=subset(Sr,sample=='beaufort')
eccadwya=subset(Sr,sample=='eccadwya')
```

#### **Shapiro-Wilk tests**

```
> shapiro.test(bead)
```

Shapiro-Wilk normality test

data: bead

W = 0.94673, p-value = 0.1943

```
> shapiro.test(highland)
```

Shapiro-Wilk normality test

data: highland

W = 0.9145, p-value = 0.005191

> shapiro.test(draken)

Shapiro-Wilk normality test

data: draken

W = 0.9125, p-value = 0.1102

> shapiro.test(upstorm)

Shapiro-Wilk normality test

data: upstorm

W = 0.90356, p-value = 0.2396

> shapiro.test(lowstorm)

Shapiro-Wilk normality test

data: lowstorm

W = 0.95239, p-value = 0.6722

> shapiro.test(beaufort)

Shapiro-Wilk normality test

data: beaufort

W = 0.96552, p-value = 0.8588

> shapiro.test(eccadwya)

Shapiro-Wilk normality test

data: eccadwya

W = 0.92706, p-value = 0.3818

## F-tests

> var.test(bead,highland)

F test to compare two variances

data: bead and highland

F = 0.97023, num df = 25, denom df = 39, p-value = 0.9553

alternative hypothesis: true ratio of variances is not equal to 1

95 percent confidence interval:

0.4841102 2.0600388

sample estimates:

ratio of variances

0.9702321

> var.test(bead,draken)

F test to compare two variances

data: bead and draken

F = 3.0009, num df = 25, denom df = 16, p-value = 0.02604

alternative hypothesis: true ratio of variances is not equal to 1

95 percent confidence interval:

1.148095 7.154237

sample estimates:

ratio of variances

3.000936

> var.test(bead,upstorm)

F test to compare two variances

data: bead and upstorm

F = 3.1389, num df = 25, denom df = 9, p-value = 0.07781

alternative hypothesis: true ratio of variances is not equal to 1

95 percent confidence interval:

0.8710724 8.4017992

sample estimates:  
ratio of variances  
3.138933

> var.test(bead,lowstorm)

F test to compare two variances  
data: bead and lowstorm  
F = 1.3579, num df = 25, denom df = 11, p-value = 0.6101  
alternative hypothesis: true ratio of variances is not equal to 1  
95 percent confidence interval:  
0.4294846 3.4765789  
sample estimates:  
ratio of variances  
1.357877

> var.test(bead,beaufort)

F test to compare two variances  
data: bead and beaufort  
F = 1.9386, num df = 25, denom df = 11, p-value = 0.2512  
alternative hypothesis: true ratio of variances is not equal to 1  
95 percent confidence interval:  
0.6131691 4.9634622  
sample estimates:  
ratio of variances  
1.938622

> var.test(bead,eccadwya)

F test to compare two variances  
data: bead and eccadwya  
F = 1.2014, num df = 25, denom df = 10, p-value = 0.7945  
alternative hypothesis: true ratio of variances is not equal to 1  
95 percent confidence interval:  
0.3581276 3.1397484  
sample estimates:  
ratio of variances  
1.201373

### Welch's *t*-tests

> t.test(bead,highland)

Welch Two Sample t-test  
data: bead and highland  
t = 10.673, df = 54.141, p-value = 6.269e-15  
alternative hypothesis: true difference in means is not equal to 0  
95 percent confidence interval:  
0.003929306 0.005746791  
sample estimates:  
mean of x mean of y  
0.7150729 0.7102349

> t.test(bead,draken)

Welch Two Sample t-test  
data: bead and draken  
t = 13.833, df = 40.528, p-value < 2.2e-16  
alternative hypothesis: true difference in means is not equal to 0  
95 percent confidence interval:

0.005091041 0.006832452

sample estimates:

mean of x mean of y

0.7150729 0.7091112

> t.test(bead,upstorm)

Welch Two Sample t-test

data: bead and upstorm

t = 5.6319, df = 28.759, p-value = 4.517e-06

alternative hypothesis: true difference in means is not equal to 0

95 percent confidence interval:

0.001700819 0.003641627

sample estimates:

mean of x mean of y

0.7150729 0.7124017

> t.test(bead,lowstorm)

Welch Two Sample t-test

data: bead and lowstorm

t = 2.6633, df = 24.819, p-value = 0.01339

alternative hypothesis: true difference in means is not equal to 0

95 percent confidence interval:

0.0003407506 0.0026694288

sample estimates:

mean of x mean of y

0.7150729 0.7135678

> t.test(bead,beaufort)

Welch Two Sample t-test

data: bead and beaufort

t = 2.3904, df = 29.204, p-value = 0.0235

alternative hypothesis: true difference in means is not equal to 0

95 percent confidence interval:

0.0001765024 0.0022638438

sample estimates:

mean of x mean of y

0.7150729 0.7138528

> t.test(bead,eccadwya)

Welch Two Sample t-test

data: bead and eccadwya

t = 0.14882, df = 20.618, p-value = 0.8831

alternative hypothesis: true difference in means is not equal to 0

95 percent confidence interval:

-0.001168109 0.001347955

sample estimates:

mean of x mean of y

0.7150729 0.7149830

## 5. Methods used to produce Figs. 1a and 6a

### *Fig. 1a*

To create the Mean Annual Precipitation and elevation profiles in Fig. 1a, the following data were obtained for southeastern southern Africa:

- (1) Worldclim v2 monthly mean precipitation data, 30 second (~1km<sup>2</sup> resolution) (accessed September 19, 2019; <http://worldclim.org/>); and
- (2) SRTM 1-arc second global (30m) resolution (accessed September 19, 2019 via [earthexplorer.usgs.gov](http://earthexplorer.usgs.gov), DOI: /10.5066.F7PR7TFT).

ArcGIS Pro was then employed to: (1) sum monthly precipitation rasters from Worldclim to create a measure of Mean Annual Precipitation; (2) mosaic the SRTM tiles; and (3) extract values from elevation and precipitation rasters along the transect shown on the map in Fig. 1a using the Stack Profile tool.

### *Fig. 6a*

To calculate minimum distances from the Lesotho rock-shelters to viable ostrich habitats underlain by Karoo Supergroup units of interest (Lower Stormberg, Beaufort and Ecc/Dwyka formations), the following data were obtained:

- (1) Council for Geoscience's 'Simplified Geologic Map of South Africa, Lesotho and Swaziland' (1:1,000,000) (accessed July 2, 2019: <http://www.geoscience.org.za/index.php/publication/downloadable-material>).
- (2) South Africa National Biodiversity Institute (SANBI) 2018 Vegetation Map of South Africa, Lesotho, and Swaziland (accessed August 2, 2019: <http://bgis.sanbi.org/SpatialDataset/Detail/670>).
- (3) Ostrich distribution map of contemporary sightings, scanned from Sinclair et al.<sup>41</sup>.

All data were then imported as individual layers into ArcGIS Pro, georeferenced where necessary, and converted to Africa Equidistant Conic projection. The simplified geologic map was queried for the Karoo Supergroup lithologies of interest. A mask was created for areas where ostriches are not endemic as discerned from both modern and historical observations. The mask combines (1) the southwest portion of the Sinclair et al. (2011) ostrich distribution map and (2) the Drakensberg Grassland, Sub-Escarpment Grassland, Sub-Escarpment Savanna, Zonal & Intrazonal Forests, and Indian Ocean Coastal Belt portions of the SANBI (bioregions) map. Identified minimum distances from site to each group by using Generate Near Table tool in ArcGIS Pro.

## 6. Key to site abbreviations in Fig. 5b

|     |                       |     |                    |
|-----|-----------------------|-----|--------------------|
| ADL | Adullam               | MW  | Merino Walk        |
| BV  | Bellevue              | MG  | Mgede              |
| BL  | Bolahla               | MZ  | Mhlwazini          |
| BW  | Bonawe                | MS  | Moshebi's Shelter  |
| BS  | Borchers Shelter      | 'M  | 'Muela             |
| CS  | Collingham Shelter    | MZS | Mzinyashana 1      |
| CW  | Colwinton             | NP  | Nkupe              |
| D1  | Diamond 1             | NT  | Ntloana Tšoana     |
| DL  | Driel                 | OL  | Oakleigh           |
| ESH | eSinhlonhlweni        | PIT | Pitsaneng          |
| GH  | Good Hope             | RC  | Ravenscraig        |
| GR  | Grassridge            | RK  | Rooikrans          |
| HM  | Ha Makotoko           | RCC | Rose Cottage Cave  |
| ISM | Ingane Shell Midden A | SHE | Sehonghong         |
| INK | iNkolimahashi         | STA | Strathalan A       |
| KTY | kwaThwaleyakhe        | TB  | Tandjesberg        |
| LH  | Leliehoek             | TV  | Te Vrede           |
| LT  | Leqhetsoana           | TF  | Tienfontein sites  |
| LIK | Likoaeng              | TL  | Tloutle            |
| LIP | Liphofung             | TFC | Tsakana Falls Cave |
| MM  | Malimong              | TW  | Twyfelpoort        |
| MQ  | Maqonqo               | UB  | Umbeli Belli       |
| MB  | Mbabane               | UMH | Umhlatuzana        |
| MEL | Melikane              | VS  | Ventershoek        |

## SI References

1. S. S. Dornan, Notes on the Bushmen of Basutoland. *Trans S Afr Phil Soc* **18**, 437–450 (1909).
2. J. B. Wright, *Bushman Raiders of the Drakensberg 1840-1870* (University of Natal Press, Pietermaritzburg, South Africa, 1971).
3. S. Challis, Creolisation on the nineteenth-century frontiers of southern Africa: a case study of the AmaTola Bushmen in the Maloti-Drakensberg. *Journ S Afr Stud* **38**, 265–280 (2012).
4. P. Mitchell, S. Challis, A ‘first’ glimpse into the Maloti Mountains: the diary of James Murray Grant’s expedition of 1873-74. *S Afr Hum* **20**, 399–461 (2008).
5. J. M. Orpen, A glimpse into the mythology of the Maluti Bushmen. *Cape Monthly Magazine* **9**, 1–13 (1874).
6. P. L. Carter, The prehistory of eastern Lesotho. PhD thesis, University of Cambridge, UK (1978).
7. J.C. Vogel, A. Fuls, E. Visser, Pretoria Radiocarbon dates III. *Radiocarbon* **28**, 1133–1172 (1986).
8. Z. Jacobs, R. G. Roberts, Testing times: old and new chronologies for the Howieson’s Poort and Still Bay industries in environmental context. *S Afr Arch Soc Goodwin Series* **10**, 9-34 (2008).
9. Z. Jacobs, *et al.*, Ages for the Middle Stone Age of southern Africa: implications for human behavior and dispersal. *Science* **322**, 733–735 (2008).
10. B. A. Stewart, *et al.*, Afromontane foragers of the Late Pleistocene: site formation, chronology and occupational pulsing at Melikane Rockshelter, Lesotho. *Quat Int* **270**, 40–60 (2012).
11. J. M. Miller, Variability in ostrich eggshell beads from the Middle and Later Stone Age of Africa. PhD thesis, University of Alberta, Canada (2019).
12. A. W. Kandel, N. J. Conard, Production sequence of ostrich eggshell beads and settlement dynamics in the Geelbek Dunes of the Western Cape, South Africa. *J Archaeol Sci* **32**, 1711–1721 (2005).
13. B. A. Stewart, A. G. Parker, G. I. Dewar, M. W. Morley, L. F. Allott, Follow the Senqu: Maloti-Drakensberg paleoenvironments and implications for early human dispersals. In *Africa From MIS 6–2*, eds Jones, S. A. & Stewart, B. A. (Springer, Dordrecht, Netherlands), 247–272 (2016).
14. C. Bronk Ramsey, Bayesian analysis of radiocarbon dates. *Radiocarbon* **511**, 337–360 (2009).
15. A. G. Hogg, *et al.*, SHCal13 southern hemisphere calibration, 0-50,000 years cal BP. *Radiocarbon* **55**, 1889–1903 (2013).
16. W. T. Bell, D. W. Zimmerman, The effect of HF etching on the morphology of quartz inclusions for thermoluminescence dating. *Archaeometry* **20**, 63–65 (1978).
17. V. Mejdahl, Thermoluminescence dating: beta-dose attenuation in quartz grains. *Archaeometry* **21**, 61–72 (1979).
18. J. R. Prescott, J. T. Hutton, Cosmic ray contributions to dose rates for luminescence and ESR dating:



- large depths and long-term time variations. *Radiat Meas* **23**, 497–500 (1994).
19. M. A. Smith, J. R. Prescott, M. J. Head, Comparison of  $^{14}\text{C}$  and luminescence chronologies at Puritjarra rock shelter, central Australia. *Quat Sci Rev* **16**, 299–320 (1997).
  20. M. L. Readhead, Thermoluminescence dose rate data and dating equations for the case of disequilibrium in the decay series. *Nucl Tracks and Radiat Meas* **13**, 197–207 (1987).
  21. R. F. Galbraith, R. G. Roberts, G. M. Laslett, H. Yoshida, H., J. M. Olley, Optical dating of single and multiple grains of quartz from Jinmium rock shelter, northern Australia: part I, experimental design and statistical models. *Archaeometry* **41**, 339–364 (1999).
  22. J. D. Lewis-Williams, D. G. Pearce, *San Spirituality: Roots, Expression and Social Consequences* (AltaMira Press, Walnut Creek, CA, 2005).
  23. P. V. Vinnicombe, Basotho oral knowledge: the last Bushman inhabitants of the Mashai District, Lesotho. In *The Eland's People: New Perspectives in the Rock Art of the Maloti-Drakensberg Bushmen. Essays in Memory of Patricia Vinnicombe*, eds Mitchell, P. J. & Smith, B. W. (Wits University Press, Johannesburg, South Africa), pp. 165–191 (2009).
  24. P. J. Mitchell, Making history at Sehonghong: Soai and the last Bushman occupants of his shelter. *S Afr Hum* **22**, 147–168 (2010).
  25. P. L. Carter, J. C. Vogel, The dating of industrial assemblages from stratified sites in eastern Lesotho *Man* **9**, 557–570 (1974).
  26. P. L. Carter, P. J. Mitchell, P. V. Vinnicombe, *Sehonghong: The Middle and Later Stone Age Industrial Sequence from a Lesotho Rockshelter*. (British Archaeological Reports International Series, Oxford, 1988).
  27. P. J. Mitchell, The late Quaternary of the Lesotho highlands, southern Africa: preliminary results and future research at Sehonghong Shelter. *Quat Int* **33**, 35–44 (1996).
  28. E. Loftus, B. A. Stewart, G. I. Dewar, J. A. Lee-Thorp, Stable isotope evidence of late MIS 3 to middle Holocene palaeoenvironments from Sehonghong Rockshelter, eastern Lesotho. *J Quat Sci* **30**, 805–816 (2015).
  29. I. Plug, P. J. Mitchell, Sehonghong: hunter-gatherer utilization of animal resources in the highlands of Lesotho. *Ann Transvaal Mus* **45**, 1–23 (2008).
  30. P. J. Mitchell, Understanding the MSA/LSA transition: the pre-20,000 BP assemblages from new excavations at Sehonghong rock-shelter, Lesotho. *S Afr Field Archaeol* **3**, 15–25 (1994).
  31. P. J. Mitchell, Revisiting the Robberg: new results and a revision of old ideas at Sehonghong rock-shelter, Lesotho. *S Afr Archaeol Bull* **50**, 28–38 (1995).
  32. P. J. Mitchell, The late Quaternary of the Lesotho highlands, southern Africa: preliminary results and future research at Sehonghong Shelter. *Quat Int* **33**, 35–44 (1996).
  33. P. J. Mitchell, Sehonghong: the late Holocene assemblages with pottery. *S Afr Archaeol Bull* **51**, 17–25 (1996).

34. A. K. Horsburgh, J. V. Moreno-Mayar, A. L. Gosling, Revisiting the Kalahari debate in the highlands: ancient DNA provides new faunal identifications at Sehonghong, Lesotho. *Azania: Archaeol. Res. in Africa* **51**, 295–306 (2016).
35. J. Pargeter, E. Loftus, P. J. Mitchell, New ages from Sehonghong rockshelter: implications for the late Pleistocene occupation of highland Lesotho. *J Archaeol Sci: Reports* **12**, 307–315 (2017).
36. J. M. McArthur, R. J. Howarth, T. R. Bailey, Strontium Isotope Stratigraphy: LOWESS version 3: best fit to the marine Sr-isotope curve for 0–509 Ma and accompanying look-up table for deriving numerical age. *J Geol* **109**, 155–170 (2001).
37. S. de Villiers, J. S. Compton, M. Lavelle, The strontium isotope systematics of the Orange River, southern Africa. *S Afr J Geol* **103**, 237–248 (2000).
38. J. D. Gleason *et al.*, Ichthyolith strontium isotope stratigraphy of a Neogene red clay sequence: Calibrating eolian dust accumulation rates in the central North Pacific. *Earth Planet. Sci. Lett.* **202**, 625–636 (2002).
39. A. M. Stancin, *et al.*, Radiogenic isotopic mapping of late Cenozoic eolian and hemipelagic sediment distribution in the east-central Pacific. *Earth Planet. Sci. Lett.* **248**, 840–850 (2006).
40. RStudio Team. RStudio: Integrated Development for R. RStudio, Inc., Boston, MA URL <http://www.rstudio.com/> (2015).
41. I. Sinclair, P. Hockey, W. Tarboton, P. Ryan, *SASOL Birds of Southern Africa (Fourth edition)* (Struik Nature, Cape Town, South Africa, 2011).
